# Supplementary material
Source: PubMed Central journal article supplement (PMC4371143)
Supplement: NIHMS665640-supplement.pdf [file NIHMS665640-supplement.pdf]

|    |   |         |         |        |        |        |        |         |         |         |         |       |       |       |
|----|---|---------|---------|--------|--------|--------|--------|---------|---------|---------|---------|-------|-------|-------|
| 49 | D | 117.498 | 174.539 | 55.222 | 40.206 | 0.000  | 0.000  | 0.000   | 0.000   | 0.000   | 0.000   | 0.000 | 0.000 | 0.000 |
| 50 | V | 109.465 | 174.487 | 60.840 | 32.067 | 20.930 | 17.961 | 0.000   | 0.000   | 0.000   | 0.000   | 0.000 | 0.000 | 0.000 |
| 51 | T | 110.572 | 174.591 | 58.487 | 71.674 | 0.000  | 22.024 | 0.000   | 0.000   | 0.000   | 0.000   | 0.000 | 0.000 | 0.000 |
| 52 | T | 109.706 | 177.060 | 59.777 | 72.911 | 0.000  | 19.322 | 0.000   | 0.000   | 0.000   | 0.000   | 0.000 | 0.000 | 0.000 |
| 53 | T | 113.970 | 176.085 | 60.920 | 67.192 | 0.000  | 22.332 | 0.000   | 0.000   | 0.000   | 0.000   | 0.000 | 0.000 | 0.000 |
| 54 | P | 0.000   | 0.000   | 64.658 | 29.665 | 29.113 | 0.000  | 48.866  | 0.000   | 0.000   | 0.000   | 0.000 | 0.000 | 0.000 |
| 55 | S | 105.932 | 176.253 | 58.086 | 62.950 | 0.000  | 0.000  | 0.000   | 0.000   | 0.000   | 0.000   | 0.000 | 0.000 | 0.000 |
| 56 | G | 109.826 | 175.832 | 45.213 | 0.000  | 0.000  | 0.000  | 0.000   | 0.000   | 0.000   | 0.000   | 0.000 | 0.000 | 0.000 |
| 57 | G | 105.805 | 172.905 | 46.480 | 0.000  | 0.000  | 0.000  | 0.000   | 0.000   | 0.000   | 0.000   | 0.000 | 0.000 | 0.000 |
| 58 | G | 109.086 | 172.807 | 43.642 | 0.000  | 0.000  | 0.000  | 0.000   | 0.000   | 0.000   | 0.000   | 0.000 | 0.000 | 0.000 |
| 59 | H | 127.776 | 174.930 | 52.820 | 30.250 | 0.000  | 0.000  | 0.000   | 123.220 | 142.939 | 0.000   | 0.000 | 0.000 | 0.000 |
| 60 | T | 127.768 | 171.847 | 61.358 | 69.821 | 0.000  | 22.059 | 0.000   | 0.000   | 0.000   | 0.000   | 0.000 | 0.000 | 0.000 |
| 61 | V | 126.493 | 173.794 | 59.808 | 33.334 | 19.899 | 19.550 | 0.000   | 0.000   | 0.000   | 0.000   | 0.000 | 0.000 | 0.000 |
| 62 | L | 126.342 | 175.554 | 51.143 | 43.344 | 26.577 | 0.000  | 26.782  | 23.675  | 0.000   | 0.000   | 0.000 | 0.000 | 0.000 |
| 63 | S | 116.370 | 174.576 | 54.893 | 64.901 | 0.000  | 0.000  | 0.000   | 0.000   | 0.000   | 0.000   | 0.000 | 0.000 | 0.000 |
| 64 | G | 111.783 | 173.058 | 45.547 | 0.000  | 0.000  | 0.000  | 0.000   | 0.000   | 0.000   | 0.000   | 0.000 | 0.000 | 0.000 |
| 65 | H | 0.000   | 0.000   | 0.000  | 0.000  | 0.000  | 0.000  | 0.000   | 0.000   | 0.000   | 0.000   | 0.000 | 0.000 | 0.000 |
| 66 | R | 0.000   | 0.000   | 0.000  | 0.000  | 0.000  | 0.000  | 0.000   | 0.000   | 0.000   | 0.000   | 0.000 | 0.000 | 0.000 |
| 67 | D | 0.000   | 0.000   | 0.000  | 0.000  | 0.000  | 0.000  | 0.000   | 0.000   | 0.000   | 0.000   | 0.000 | 0.000 | 0.000 |
| 68 | T | 0.000   | 0.000   | 0.000  | 0.000  | 0.000  | 0.000  | 0.000   | 0.000   | 0.000   | 0.000   | 0.000 | 0.000 | 0.000 |
| 69 | V | 0.000   | 0.000   | 0.000  | 0.000  | 0.000  | 0.000  | 0.000   | 0.000   | 0.000   | 0.000   | 0.000 | 0.000 | 0.000 |
| 70 | F | 0.000   | 0.000   | 0.000  | 0.000  | 0.000  | 0.000  | 0.000   | 0.000   | 0.000   | 0.000   | 0.000 | 0.000 | 0.000 |
| 71 | T | 0.000   | 0.000   | 0.000  | 0.000  | 0.000  | 0.000  | 0.000   | 0.000   | 0.000   | 0.000   | 0.000 | 0.000 | 0.000 |
| 72 | D | 0.000   | 0.000   | 0.000  | 0.000  | 0.000  | 0.000  | 0.000   | 0.000   | 0.000   | 0.000   | 0.000 | 0.000 | 0.000 |
| 73 | L | 0.000   | 0.000   | 0.000  | 0.000  | 0.000  | 0.000  | 0.000   | 0.000   | 0.000   | 0.000   | 0.000 | 0.000 | 0.000 |
| 74 | G | 0.000   | 173.703 | 45.507 | 0.000  | 0.000  | 0.000  | 0.000   | 0.000   | 0.000   | 0.000   | 0.000 | 0.000 | 0.000 |
| 75 | Q | 116.093 | 177.319 | 56.016 | 29.310 | 33.660 | 0.000  | 0.000   | 0.000   | 0.000   | 0.000   | 0.000 | 0.000 | 0.000 |
| 76 | L | 117.894 | 175.639 | 54.578 | 41.720 | 27.077 | 0.000  | 26.131  | 24.590  | 0.000   | 0.000   | 0.000 | 0.000 | 0.000 |
| 77 | K | 122.287 | 175.553 | 53.336 | 36.380 | 24.915 | 0.000  | 28.317  | 0.000   | 41.616  | 0.000   | 0.000 | 0.000 | 0.000 |
| 78 | E | 118.949 | 177.053 | 59.205 | 28.284 | 36.480 | 0.000  | 0.000   | 0.000   | 0.000   | 0.000   | 0.000 | 0.000 | 0.000 |
| 79 | K | 114.843 | 176.434 | 59.231 | 29.657 | 25.505 | 0.000  | 28.594  | 0.000   | 41.704  | 0.000   | 0.000 | 0.000 | 0.000 |
| 80 | D | 119.664 | 175.886 | 55.661 | 41.782 | 0.000  | 0.000  | 0.000   | 0.000   | 0.000   | 0.000   | 0.000 | 0.000 | 0.000 |
| 81 | T | 111.597 | 174.221 | 61.103 | 71.264 | 0.000  | 22.351 | 0.000   | 0.000   | 0.000   | 0.000   | 0.000 | 0.000 | 0.000 |
| 82 | L | 120.358 | 174.850 | 53.721 | 45.655 | 25.931 | 0.000  | 24.718  | 0.000   | 0.000   | 0.000   | 0.000 | 0.000 | 0.000 |
| 83 | V | 121.834 | 174.766 | 61.157 | 34.923 | 20.998 | 0.000  | 0.000   | 0.000   | 0.000   | 0.000   | 0.000 | 0.000 | 0.000 |
| 84 | L | 129.811 | 175.644 | 53.160 | 46.815 | 27.972 | 0.000  | 26.408  | 25.507  | 0.000   | 0.000   | 0.000 | 0.000 | 0.000 |
| 85 | E | 125.273 | 175.910 | 54.716 | 30.904 | 35.789 | 0.000  | 0.000   | 0.000   | 0.000   | 0.000   | 0.000 | 0.000 | 0.000 |
| 86 | Y | 125.299 | 174.077 | 57.516 | 41.720 | 0.000  | 0.000  | 0.000   | 136.106 | 0.000   | 108.838 | 0.000 | 0.000 | 0.000 |
| 87 | D | 131.006 | 171.773 | 54.613 | 39.659 | 0.000  | 0.000  | 0.000   | 0.000   | 0.000   | 0.000   | 0.000 | 0.000 | 0.000 |
| 88 | N | 109.843 | 173.995 | 54.528 | 37.383 | 0.000  | 0.000  | 0.000   | 0.000   | 0.000   | 0.000   | 0.000 | 0.000 | 0.000 |
| 89 | K | 119.021 | 174.644 | 55.133 | 36.460 | 25.254 | 0.000  | 28.711  | 0.000   | 41.513  | 0.000   | 0.000 | 0.000 | 0.000 |
| 90 | T | 117.141 | 172.823 | 61.745 | 69.709 | 0.000  | 22.062 | 0.000   | 0.000   | 0.000   | 0.000   | 0.000 | 0.000 | 0.000 |
| 91 | Y | 127.333 | 174.313 | 56.764 | 41.054 | 0.000  | 0.000  | 129.785 | 0.000   | 124.353 | 0.000   | 0.000 | 0.000 | 0.000 |
| 92 | T | 117.709 | 172.464 | 61.320 | 69.546 | 0.000  | 21.159 | 0.000   | 0.000   | 0.000   | 0.000   | 0.000 | 0.000 | 0.000 |
| 93 | Y | 122.946 | 174.846 | 55.804 | 42.627 | 0.000  | 0.000  | 0.000   | 134.739 | 0.000   | 135.823 | 0.000 | 0.000 | 0.000 |
| 94 | E | 121.240 | 177.060 | 54.073 | 33.787 | 37.124 | 0.000  | 0.000   | 0.000   | 0.000   | 0.000   | 0.000 | 0.000 | 0.000 |
| 95 | I | 128.525 | 176.261 | 64.664 | 37.472 | 24.334 | 17.549 | 14.249  | 0.000   | 0.000   | 0.000   | 0.000 | 0.000 | 0.000 |
| 96 | Q | 127.221 | 174.674 | 54.632 | 31.165 | 32.347 | 0.000  | 0.000   | 0.000   | 0.000   | 0.000   | 0.000 | 0.000 | 0.000 |
| 97 | K | 120.717 | 173.200 | 56.528 | 36.462 | 25.019 | 0.000  | 0.000   | 0.000   | 0.000   | 0.000   | 0.000 | 0.000 | 0.000 |
| 98 | I | 125.089 | 175.821 | 60.078 | 42.082 | 27.991 | 16.427 | 21.413  | 0.000   | 0.000   | 0.000   | 0.000 | 0.000 | 0.000 |
| 99 | W | 129.003 | 170.353 | 56.388 | 31.158 | 0.000  | 0.000  | 125.125 | 0.000   | 0.000   | 0.000   | 0.000 | 0.000 | 0.000 |



Supporting Table S2: 15N and 13C chemical shifts in MLKL (from BMRB 18152)

| restype | N       | CO      | CA     | CB     | CG1    | CG2    | CD1     | CD2     | CE1     | CE2     | CZ1   | CZ2   | CZ3   |
|---------|---------|---------|--------|--------|--------|--------|---------|---------|---------|---------|-------|-------|-------|
| 1 G     | 0.000   | 0.000   | 0.000  | 0.000  | 0.000  | 0.000  | 0.000   | 0.000   | 0.000   | 0.000   | 0.000 | 0.000 | 0.000 |
| 2 S     | 0.000   | 0.000   | 0.000  | 0.000  | 0.000  | 0.000  | 0.000   | 0.000   | 0.000   | 0.000   | 0.000 | 0.000 | 0.000 |
| 3 P     | 0.000   | 0.000   | 0.000  | 0.000  | 0.000  | 0.000  | 0.000   | 0.000   | 0.000   | 0.000   | 0.000 | 0.000 | 0.000 |
| 4 G     | 0.000   | 0.000   | 0.000  | 0.000  | 0.000  | 0.000  | 0.000   | 0.000   | 0.000   | 0.000   | 0.000 | 0.000 | 0.000 |
| 5 I     | 0.000   | 0.000   | 0.000  | 0.000  | 0.000  | 0.000  | 0.000   | 0.000   | 0.000   | 0.000   | 0.000 | 0.000 | 0.000 |
| 6 S     | 0.000   | 0.000   | 0.000  | 0.000  | 0.000  | 0.000  | 0.000   | 0.000   | 0.000   | 0.000   | 0.000 | 0.000 | 0.000 |
| 7 G     | 0.000   | 0.000   | 0.000  | 0.000  | 0.000  | 0.000  | 0.000   | 0.000   | 0.000   | 0.000   | 0.000 | 0.000 | 0.000 |
| 8 G     | 0.000   | 0.000   | 0.000  | 0.000  | 0.000  | 0.000  | 0.000   | 0.000   | 0.000   | 0.000   | 0.000 | 0.000 | 0.000 |
| 9 G     | 0.000   | 0.000   | 0.000  | 0.000  | 0.000  | 0.000  | 0.000   | 0.000   | 0.000   | 0.000   | 0.000 | 0.000 | 0.000 |
| 10 G    | 0.000   | 0.000   | 0.000  | 0.000  | 0.000  | 0.000  | 0.000   | 0.000   | 0.000   | 0.000   | 0.000 | 0.000 | 0.000 |
| 11 G    | 0.000   | 0.000   | 0.000  | 0.000  | 0.000  | 0.000  | 0.000   | 0.000   | 0.000   | 0.000   | 0.000 | 0.000 | 0.000 |
| 12 I    | 0.000   | 0.000   | 0.000  | 0.000  | 0.000  | 0.000  | 0.000   | 0.000   | 0.000   | 0.000   | 0.000 | 0.000 | 0.000 |
| 13 L    | 121.100 | 179.300 | 57.900 | 40.800 | 27.300 | 0.000  | 25.100  | 23.300  | 0.000   | 0.000   | 0.000 | 0.000 | 0.000 |
| 14 E    | 120.000 | 178.400 | 59.400 | 29.200 | 36.500 | 0.000  | 0.000   | 0.000   | 0.000   | 0.000   | 0.000 | 0.000 | 0.000 |
| 15 N    | 117.300 | 177.900 | 55.800 | 39.000 | 0.000  | 0.000  | 0.000   | 0.000   | 0.000   | 0.000   | 0.000 | 0.000 | 0.000 |
| 16 L    | 119.700 | 177.900 | 58.400 | 42.000 | 0.000  | 0.000  | 25.800  | 25.100  | 0.000   | 0.000   | 0.000 | 0.000 | 0.000 |
| 17 K    | 118.200 | 179.200 | 60.000 | 31.900 | 24.900 | 0.000  | 29.400  | 0.000   | 42.200  | 0.000   | 0.000 | 0.000 | 0.000 |
| 18 H    | 118.400 | 178.200 | 59.100 | 30.900 | 0.000  | 0.000  | 0.000   | 118.500 | 138.700 | 0.000   | 0.000 | 0.000 | 0.000 |
| 19 I    | 120.300 | 176.500 | 66.000 | 38.700 | 30.900 | 18.300 | 14.500  | 0.000   | 0.000   | 0.000   | 0.000 | 0.000 | 0.000 |
| 20 I    | 120.200 | 178.000 | 65.800 | 38.600 | 30.200 | 17.400 | 14.400  | 0.000   | 0.000   | 0.000   | 0.000 | 0.000 | 0.000 |
| 21 T    | 115.400 | 176.300 | 66.900 | 68.800 | 0.000  | 21.600 | 0.000   | 0.000   | 0.000   | 0.000   | 0.000 | 0.000 | 0.000 |
| 22 L    | 122.100 | 178.800 | 57.900 | 42.300 | 27.700 | 0.000  | 23.900  | 26.100  | 0.000   | 0.000   | 0.000 | 0.000 | 0.000 |
| 23 G    | 105.800 | 174.700 | 47.500 | 0.000  | 0.000  | 0.000  | 0.000   | 0.000   | 0.000   | 0.000   | 0.000 | 0.000 | 0.000 |
| 24 Q    | 119.600 | 179.600 | 59.300 | 27.900 | 34.000 | 0.000  | 0.000   | 0.000   | 0.000   | 0.000   | 0.000 | 0.000 | 0.000 |
| 25 V    | 122.600 | 178.500 | 66.700 | 31.900 | 20.800 | 23.200 | 0.000   | 0.000   | 0.000   | 0.000   | 0.000 | 0.000 | 0.000 |
| 26 I    | 121.000 | 177.700 | 65.800 | 38.400 | 30.200 | 17.100 | 16.000  | 0.000   | 0.000   | 0.000   | 0.000 | 0.000 | 0.000 |
| 27 H    | 118.900 | 176.200 | 61.300 | 30.000 | 0.000  | 0.000  | 0.000   | 121.500 | 137.700 | 0.000   | 0.000 | 0.000 | 0.000 |
| 28 K    | 118.500 | 179.200 | 59.500 | 32.500 | 24.800 | 0.000  | 29.300  | 0.000   | 42.400  | 0.000   | 0.000 | 0.000 | 0.000 |
| 29 R    | 117.600 | 180.600 | 59.200 | 30.500 | 27.800 | 0.000  | 43.600  | 0.000   | 0.000   | 0.000   | 0.000 | 0.000 | 0.000 |
| 30 C    | 118.100 | 177.300 | 65.900 | 27.600 | 0.000  | 0.000  | 0.000   | 0.000   | 0.000   | 0.000   | 0.000 | 0.000 | 0.000 |
| 31 E    | 117.900 | 177.100 | 58.300 | 30.000 | 36.400 | 0.000  | 0.000   | 0.000   | 0.000   | 0.000   | 0.000 | 0.000 | 0.000 |
| 32 E    | 115.400 | 177.100 | 55.900 | 30.600 | 36.200 | 0.000  | 0.000   | 0.000   | 0.000   | 0.000   | 0.000 | 0.000 | 0.000 |
| 33 M    | 120.500 | 177.800 | 56.400 | 33.300 | 33.300 | 0.000  | 0.000   | 0.000   | 18.300  | 0.000   | 0.000 | 0.000 | 0.000 |
| 34 K    | 120.500 | 175.400 | 57.000 | 33.600 | 25.200 | 0.000  | 29.000  | 0.000   | 42.300  | 0.000   | 0.000 | 0.000 | 0.000 |
| 35 Y    | 115.500 | 173.700 | 55.000 | 41.900 | 0.000  | 0.000  | 133.600 | 133.600 | 118.000 | 118.000 | 0.000 | 0.000 | 0.000 |
| 36 C    | 113.600 | 174.700 | 60.400 | 26.100 | 0.000  | 0.000  | 0.000   | 0.000   | 0.000   | 0.000   | 0.000 | 0.000 | 0.000 |
| 37 K    | 115.800 | 179.800 | 60.700 | 33.300 | 25.800 | 0.000  | 29.700  | 0.000   | 41.800  | 0.000   | 0.000 | 0.000 | 0.000 |
| 38 K    | 121.000 | 181.300 | 59.000 | 30.400 | 24.600 | 0.000  | 28.000  | 0.000   | 42.100  | 0.000   | 0.000 | 0.000 | 0.000 |
| 39 Q    | 120.500 | 180.200 | 59.300 | 32.100 | 38.100 | 0.000  | 0.000   | 0.000   | 0.000   | 0.000   | 0.000 | 0.000 | 0.000 |
| 40 C    | 118.800 | 176.200 | 64.300 | 26.800 | 0.000  | 0.000  | 0.000   | 0.000   | 0.000   | 0.000   | 0.000 | 0.000 | 0.000 |
| 41 R    | 119.300 | 178.900 | 59.300 | 29.200 | 28.600 | 0.000  | 43.600  | 0.000   | 0.000   | 0.000   | 0.000 | 0.000 | 0.000 |
| 42 R    | 119.700 | 178.000 | 58.200 | 29.100 | 29.000 | 0.000  | 41.600  | 0.000   | 0.000   | 0.000   | 0.000 | 0.000 | 0.000 |
| 43 L    | 120.600 | 178.400 | 58.300 | 40.200 | 27.100 | 0.000  | 22.700  | 25.200  | 0.000   | 0.000   | 0.000 | 0.000 | 0.000 |
| 44 G    | 105.200 | 175.600 | 48.400 | 0.000  | 0.000  | 0.000  | 0.000   | 0.000   | 0.000   | 0.000   | 0.000 | 0.000 | 0.000 |
| 45 H    | 120.500 | 179.400 | 59.600 | 30.600 | 0.000  | 0.000  | 0.000   | 119.300 | 137.900 | 0.000   | 0.000 | 0.000 | 0.000 |
| 46 R    | 121.900 | 179.600 | 59.500 | 30.100 | 27.600 | 0.000  | 42.500  | 0.000   | 0.000   | 0.000   | 0.000 | 0.000 | 0.000 |
| 47 V    | 118.500 | 177.600 | 67.800 | 31.300 | 22.800 | 23.900 | 0.000   | 0.000   | 0.000   | 0.000   | 0.000 | 0.000 | 0.000 |
| 48 L    | 118.300 | 179.600 | 58.000 | 41.400 | 26.100 | 0.000  | 24.100  | 22.600  | 0.000   | 0.000   | 0.000 | 0.000 | 0.000 |







Supporting Table S3: NCACX signal table for SrtC, with 0.1001 ppm chemical shift uncertainties and unambiguous residue-type assignments. (A shift value of 1111.1 indicates absent data.)

| N(i)    | CO(i)   | CA(i)  | CB(i)  | dN     | dCO    | dCA    | dCB    | restype |
|---------|---------|--------|--------|--------|--------|--------|--------|---------|
| 122.485 | 1111.1  | 55.218 | 28.842 | 0.1001 | 0.1001 | 0.1001 | 0.1001 | 1 Q     |
| 115.244 | 173.961 | 61.486 | 69.316 | 0.1001 | 0.1001 | 0.1001 | 0.1001 | 1 T     |
| 123.496 | 175.555 | 55.868 | 29.611 | 0.1001 | 0.1001 | 0.1001 | 0.1001 | 1 E     |
| 119.084 | 173.742 | 53.932 | 28.922 | 0.1001 | 0.1001 | 0.1001 | 0.1001 | 1 H     |
| 121.509 | 176.210 | 54.245 | 33.548 | 0.1001 | 0.1001 | 0.1001 | 0.1001 | 1 K     |
| 123.025 | 178.023 | 58.350 | 29.254 | 0.1001 | 0.1001 | 0.1001 | 0.1001 | 1 E     |
| 113.216 | 174.141 | 45.243 | 1111.1 | 0.1001 | 0.1001 | 0.1001 | 0.1001 | 1 G     |
| 120.782 | 176.436 | 55.641 | 30.989 | 0.1001 | 0.1001 | 0.1001 | 0.1001 | 1 E     |
| 125.126 | 176.970 | 57.098 | 31.680 | 0.1001 | 0.1001 | 0.1001 | 0.1001 | 1 K     |
| 119.214 | 174.148 | 60.141 | 34.881 | 0.1001 | 0.1001 | 0.1001 | 0.1001 | 1 V     |
| 121.368 | 174.664 | 51.098 | 22.853 | 0.1001 | 0.1001 | 0.1001 | 0.1001 | 1 A     |
| 116.475 | 174.413 | 53.607 | 35.038 | 0.1001 | 0.1001 | 0.1001 | 0.1001 | 1 M     |
| 126.244 | 173.617 | 52.851 | 44.705 | 0.1001 | 0.1001 | 0.1001 | 0.1001 | 1 L     |
| 126.596 | 174.316 | 51.344 | 40.972 | 0.1001 | 0.1001 | 0.1001 | 0.1001 | 1 N     |
| 123.799 | 174.409 | 58.243 | 37.477 | 0.1001 | 0.1001 | 0.1001 | 0.1001 | 1 I     |
| 118.170 | 177.231 | 58.643 | 33.171 | 0.1001 | 0.1001 | 0.1001 | 0.1001 | 1 K     |
| 111.984 | 175.562 | 52.965 | 42.473 | 0.1001 | 0.1001 | 0.1001 | 0.1001 | 1 L     |
| 115.814 | 175.297 | 56.598 | 28.918 | 0.1001 | 0.1001 | 0.1001 | 0.1001 | 1 K     |
| 115.145 | 173.961 | 53.788 | 37.483 | 0.1001 | 0.1001 | 0.1001 | 0.1001 | 1 K     |
| 119.758 | 175.482 | 53.883 | 35.855 | 0.1001 | 0.1001 | 0.1001 | 0.1001 | 1 K     |
| 119.077 | 175.477 | 56.100 | 42.734 | 0.1001 | 0.1001 | 0.1001 | 0.1001 | 1 F     |
| 121.189 | 172.010 | 59.961 | 64.433 | 0.1001 | 0.1001 | 0.1001 | 0.1001 | 1 S     |
| 120.881 | 174.874 | 57.775 | 38.001 | 0.1001 | 0.1001 | 0.1001 | 0.1001 | 1 I     |
| 127.573 | 174.806 | 56.120 | 41.139 | 0.1001 | 0.1001 | 0.1001 | 0.1001 | 1 Y     |
| 121.993 | 175.194 | 57.396 | 29.670 | 0.1001 | 0.1001 | 0.1001 | 0.1001 | 1 W     |
| 120.470 | 171.936 | 44.532 | 1111.1 | 0.1001 | 0.1001 | 0.1001 | 0.1001 | 1 G     |
| 120.239 | 176.174 | 49.913 | 18.955 | 0.1001 | 0.1001 | 0.1001 | 0.1001 | 1 A     |
| 118.828 | 175.990 | 53.030 | 41.508 | 0.1001 | 0.1001 | 0.1001 | 0.1001 | 1 D     |
| 121.051 | 177.296 | 55.183 | 39.837 | 0.1001 | 0.1001 | 0.1001 | 0.1001 | 1 D     |
| 119.568 | 179.598 | 53.967 | 18.009 | 0.1001 | 0.1001 | 0.1001 | 0.1001 | 1 A     |
| 121.961 | 174.308 | 61.079 | 32.911 | 0.1001 | 0.1001 | 0.1001 | 0.1001 | 1 V     |
| 114.325 | 172.465 | 43.458 | 1111.1 | 0.1001 | 0.1001 | 0.1001 | 0.1001 | 1 G     |
| 125.031 | 173.873 | 54.084 | 34.548 | 0.1001 | 0.1001 | 0.1001 | 0.1001 | 1 M     |
| 127.637 | 175.023 | 59.286 | 40.644 | 0.1001 | 0.1001 | 0.1001 | 0.1001 | 1 F     |
| 130.695 | 174.235 | 61.455 | 32.002 | 0.1001 | 0.1001 | 0.1001 | 0.1001 | 1 V     |
| 120.391 | 173.167 | 57.384 | 65.720 | 0.1001 | 0.1001 | 0.1001 | 0.1001 | 1 S     |
| 117.498 | 174.539 | 55.222 | 40.206 | 0.1001 | 0.1001 | 0.1001 | 0.1001 | 1 D     |
| 109.465 | 174.487 | 60.840 | 32.067 | 0.1001 | 0.1001 | 0.1001 | 0.1001 | 1 V     |
| 110.572 | 174.591 | 58.487 | 71.674 | 0.1001 | 0.1001 | 0.1001 | 0.1001 | 1 T     |
| 109.706 | 177.060 | 59.777 | 72.911 | 0.1001 | 0.1001 | 0.1001 | 0.1001 | 1 T     |
| 113.970 | 176.085 | 60.920 | 67.192 | 0.1001 | 0.1001 | 0.1001 | 0.1001 | 1 T     |
| 105.932 | 176.253 | 58.086 | 62.950 | 0.1001 | 0.1001 | 0.1001 | 0.1001 | 1 S     |
| 109.826 | 175.832 | 45.213 | 1111.1 | 0.1001 | 0.1001 | 0.1001 | 0.1001 | 1 G     |
| 105.805 | 172.905 | 46.480 | 1111.1 | 0.1001 | 0.1001 | 0.1001 | 0.1001 | 1 G     |
| 109.086 | 172.807 | 43.642 | 1111.1 | 0.1001 | 0.1001 | 0.1001 | 0.1001 | 1 G     |
| 127.776 | 174.930 | 52.820 | 30.250 | 0.1001 | 0.1001 | 0.1001 | 0.1001 | 1 H     |
| 127.768 | 171.847 | 61.358 | 69.821 | 0.1001 | 0.1001 | 0.1001 | 0.1001 | 1 T     |



|         |         |        |        |        |        |        |        |   |   |
|---------|---------|--------|--------|--------|--------|--------|--------|---|---|
| 126.493 | 173.794 | 59.808 | 33.334 | 0.1001 | 0.1001 | 0.1001 | 0.1001 | 1 | V |
| 126.342 | 175.554 | 51.143 | 43.344 | 0.1001 | 0.1001 | 0.1001 | 0.1001 | 1 | L |
| 116.370 | 174.576 | 54.893 | 64.901 | 0.1001 | 0.1001 | 0.1001 | 0.1001 | 1 | S |
| 111.783 | 173.058 | 45.547 | 1111.1 | 0.1001 | 0.1001 | 0.1001 | 0.1001 | 1 | G |
| 116.093 | 177.319 | 56.016 | 29.310 | 0.1001 | 0.1001 | 0.1001 | 0.1001 | 1 | Q |
| 117.894 | 175.639 | 54.578 | 41.720 | 0.1001 | 0.1001 | 0.1001 | 0.1001 | 1 | L |
| 122.287 | 175.553 | 53.336 | 36.380 | 0.1001 | 0.1001 | 0.1001 | 0.1001 | 1 | K |
| 118.949 | 177.053 | 59.205 | 28.284 | 0.1001 | 0.1001 | 0.1001 | 0.1001 | 1 | E |
| 114.843 | 176.434 | 59.231 | 29.657 | 0.1001 | 0.1001 | 0.1001 | 0.1001 | 1 | K |
| 119.664 | 175.886 | 55.661 | 41.782 | 0.1001 | 0.1001 | 0.1001 | 0.1001 | 1 | D |
| 111.597 | 174.221 | 61.103 | 71.264 | 0.1001 | 0.1001 | 0.1001 | 0.1001 | 1 | T |
| 120.358 | 174.850 | 53.721 | 45.655 | 0.1001 | 0.1001 | 0.1001 | 0.1001 | 1 | L |
| 121.834 | 174.766 | 61.157 | 34.923 | 0.1001 | 0.1001 | 0.1001 | 0.1001 | 1 | V |
| 129.811 | 175.644 | 53.160 | 46.815 | 0.1001 | 0.1001 | 0.1001 | 0.1001 | 1 | L |
| 125.273 | 175.910 | 54.716 | 30.904 | 0.1001 | 0.1001 | 0.1001 | 0.1001 | 1 | E |
| 125.299 | 174.077 | 57.516 | 41.720 | 0.1001 | 0.1001 | 0.1001 | 0.1001 | 1 | Y |
| 131.006 | 171.773 | 54.613 | 39.659 | 0.1001 | 0.1001 | 0.1001 | 0.1001 | 1 | D |
| 109.843 | 173.995 | 54.528 | 37.383 | 0.1001 | 0.1001 | 0.1001 | 0.1001 | 1 | N |
| 119.021 | 174.644 | 55.133 | 36.460 | 0.1001 | 0.1001 | 0.1001 | 0.1001 | 1 | K |
| 117.141 | 172.823 | 61.745 | 69.709 | 0.1001 | 0.1001 | 0.1001 | 0.1001 | 1 | T |
| 127.333 | 174.313 | 56.764 | 41.054 | 0.1001 | 0.1001 | 0.1001 | 0.1001 | 1 | Y |
| 117.709 | 172.464 | 61.320 | 69.546 | 0.1001 | 0.1001 | 0.1001 | 0.1001 | 1 | T |
| 122.946 | 174.846 | 55.804 | 42.627 | 0.1001 | 0.1001 | 0.1001 | 0.1001 | 1 | Y |
| 121.240 | 177.060 | 54.073 | 33.787 | 0.1001 | 0.1001 | 0.1001 | 0.1001 | 1 | E |
| 128.525 | 176.261 | 64.664 | 37.472 | 0.1001 | 0.1001 | 0.1001 | 0.1001 | 1 | I |
| 127.221 | 174.674 | 54.632 | 31.165 | 0.1001 | 0.1001 | 0.1001 | 0.1001 | 1 | Q |
| 120.717 | 173.200 | 56.528 | 36.462 | 0.1001 | 0.1001 | 0.1001 | 0.1001 | 1 | K |
| 125.089 | 175.821 | 60.078 | 42.082 | 0.1001 | 0.1001 | 0.1001 | 0.1001 | 1 | I |
| 129.003 | 170.353 | 56.388 | 31.158 | 0.1001 | 0.1001 | 0.1001 | 0.1001 | 1 | W |
| 117.739 | 176.258 | 58.973 | 40.734 | 0.1001 | 0.1001 | 0.1001 | 0.1001 | 1 | I |
| 120.676 | 172.069 | 57.557 | 70.656 | 0.1001 | 0.1001 | 0.1001 | 0.1001 | 1 | T |
| 119.885 | 176.781 | 54.482 | 31.240 | 0.1001 | 0.1001 | 0.1001 | 0.1001 | 1 | H |
| 121.632 | 177.587 | 54.899 | 17.981 | 0.1001 | 0.1001 | 0.1001 | 0.1001 | 1 | A |
| 114.513 | 175.283 | 53.070 | 40.034 | 0.1001 | 0.1001 | 0.1001 | 0.1001 | 1 | D |
| 119.184 | 177.674 | 54.268 | 39.846 | 0.1001 | 0.1001 | 0.1001 | 0.1001 | 1 | D |
| 127.998 | 177.709 | 55.888 | 29.264 | 0.1001 | 0.1001 | 0.1001 | 0.1001 | 1 | R |
| 111.880 | 173.548 | 62.350 | 68.935 | 0.1001 | 0.1001 | 0.1001 | 0.1001 | 1 | T |
| 118.971 | 176.853 | 63.878 | 32.470 | 0.1001 | 0.1001 | 0.1001 | 0.1001 | 1 | V |
| 120.334 | 173.191 | 60.963 | 33.933 | 0.1001 | 0.1001 | 0.1001 | 0.1001 | 1 | I |
| 118.981 | 174.405 | 57.932 | 42.146 | 0.1001 | 0.1001 | 0.1001 | 0.1001 | 1 | I |
| 123.307 | 176.528 | 56.695 | 33.092 | 0.1001 | 0.1001 | 0.1001 | 0.1001 | 1 | K |
| 121.425 | 175.996 | 53.271 | 36.089 | 0.1001 | 0.1001 | 0.1001 | 0.1001 | 1 | K |
| 119.533 | 174.477 | 55.175 | 29.097 | 0.1001 | 0.1001 | 0.1001 | 0.1001 | 1 | E |
| 117.843 | 172.378 | 52.633 | 30.487 | 0.1001 | 0.1001 | 0.1001 | 0.1001 | 1 | I |
| 130.464 | 172.992 | 56.976 | 41.420 | 0.1001 | 0.1001 | 0.1001 | 0.1001 | 1 | I |
| 128.504 | 174.488 | 52.062 | 45.447 | 0.1001 | 0.1001 | 0.1001 | 0.1001 | 1 | L |
| 125.436 | 173.169 | 60.596 | 68.558 | 0.1001 | 0.1001 | 0.1001 | 0.1001 | 1 | T |
| 128.310 | 174.404 | 52.439 | 44.373 | 0.1001 | 0.1001 | 0.1001 | 0.1001 | 1 | L |
| 117.635 | 172.735 | 57.360 | 70.136 | 0.1001 | 0.1001 | 0.1001 | 0.1001 | 1 | T |
| 116.149 | 174.145 | 59.550 | 71.701 | 0.1001 | 0.1001 | 0.1001 | 0.1001 | 1 | T |
| 120.754 | 176.083 | 58.918 | 38.624 | 0.1001 | 0.1001 | 0.1001 | 0.1001 | 1 | F |

|         |         |        |        |        |        |        |        |   |   |
|---------|---------|--------|--------|--------|--------|--------|--------|---|---|
| 114.938 | 175.285 | 51.974 | 39.454 | 0.1001 | 0.1001 | 0.1001 | 0.1001 | 1 | D |
| 121.170 | 175.022 | 58.734 | 39.330 | 0.1001 | 0.1001 | 0.1001 | 0.1001 | 1 | Y |
| 127.293 | 174.579 | 60.165 | 37.120 | 0.1001 | 0.1001 | 0.1001 | 0.1001 | 1 | I |
| 114.862 | 172.992 | 43.458 | 1111.1 | 0.1001 | 0.1001 | 0.1001 | 0.1001 | 1 | G |
| 122.165 | 174.579 | 53.344 | 39.979 | 0.1001 | 0.1001 | 0.1001 | 0.1001 | 1 | D |
| 129.087 | 176.791 | 50.186 | 17.692 | 0.1001 | 0.1001 | 0.1001 | 0.1001 | 1 | A |
| 117.477 | 175.988 | 53.067 | 45.102 | 0.1001 | 0.1001 | 0.1001 | 0.1001 | 1 | D |
| 120.986 | 172.288 | 53.958 | 33.787 | 0.1001 | 0.1001 | 0.1001 | 0.1001 | 1 | R |
| 127.342 | 173.811 | 57.419 | 40.515 | 0.1001 | 0.1001 | 0.1001 | 0.1001 | 1 | Y |
| 128.458 | 173.610 | 58.968 | 40.998 | 0.1001 | 0.1001 | 0.1001 | 0.1001 | 1 | I |
| 123.623 | 173.524 | 59.873 | 40.767 | 0.1001 | 0.1001 | 0.1001 | 0.1001 | 1 | I |
| 127.009 | 175.383 | 54.895 | 33.904 | 0.1001 | 0.1001 | 0.1001 | 0.1001 | 1 | E |
| 132.785 | 173.789 | 50.197 | 24.262 | 0.1001 | 0.1001 | 0.1001 | 0.1001 | 1 | A |
| 120.672 | 175.807 | 54.250 | 34.937 | 0.1001 | 0.1001 | 0.1001 | 0.1001 | 1 | K |
| 126.557 | 177.236 | 56.169 | 42.408 | 0.1001 | 0.1001 | 0.1001 | 0.1001 | 1 | L |
| 119.454 | 175.187 | 60.915 | 69.490 | 0.1001 | 0.1001 | 0.1001 | 0.1001 | 1 | T |
| 109.946 | 170.713 | 45.254 | 1111.1 | 0.1001 | 0.1001 | 0.1001 | 0.1001 | 1 | G |
| 112.778 | 173.178 | 56.393 | 65.587 | 0.1001 | 0.1001 | 0.1001 | 0.1001 | 1 | S |
| 119.351 | 174.580 | 56.413 | 40.096 | 0.1001 | 0.1001 | 0.1001 | 0.1001 | 1 | Y |
| 117.533 | 1111.1  | 58.000 | 63.905 | 0.1001 | 0.1001 | 0.1001 | 0.1001 | 1 | S |
| 128.839 | 181.294 | 57.693 | 32.915 | 0.1001 | 0.1001 | 0.1001 | 0.1001 | 1 | K |

Supporting Table S4: NCOCX signal table for SrtC, with 0.1001 ppm chemical shift uncertainties and unambiguous residue-type assignments. (A shift value of 1111.1 indicates absent data.)

| N(i+1)  | CO(i)   | CA(i)  | CB(i)  | dN     | dCO    | dCA    | dCB    | restype |
|---------|---------|--------|--------|--------|--------|--------|--------|---------|
| 115.244 | 1111.1  | 55.218 | 28.842 | 0.1001 | 0.1001 | 0.1001 | 0.1001 | 1 Q     |
| 123.496 | 173.961 | 61.486 | 69.316 | 0.1001 | 0.1001 | 0.1001 | 0.1001 | 1 T     |
| 119.084 | 175.555 | 55.868 | 29.611 | 0.1001 | 0.1001 | 0.1001 | 0.1001 | 1 E     |
| 121.509 | 173.742 | 53.932 | 28.922 | 0.1001 | 0.1001 | 0.1001 | 0.1001 | 1 H     |
| 123.025 | 176.210 | 54.245 | 33.548 | 0.1001 | 0.1001 | 0.1001 | 0.1001 | 1 K     |
| 113.216 | 178.023 | 58.350 | 29.254 | 0.1001 | 0.1001 | 0.1001 | 0.1001 | 1 E     |
| 120.782 | 174.141 | 45.243 | 1111.1 | 0.1001 | 0.1001 | 0.1001 | 0.1001 | 1 G     |
| 125.126 | 176.436 | 55.641 | 30.989 | 0.1001 | 0.1001 | 0.1001 | 0.1001 | 1 E     |
| 119.214 | 176.970 | 57.098 | 31.680 | 0.1001 | 0.1001 | 0.1001 | 0.1001 | 1 K     |
| 121.368 | 174.148 | 60.141 | 34.881 | 0.1001 | 0.1001 | 0.1001 | 0.1001 | 1 V     |
| 116.475 | 174.664 | 51.098 | 22.853 | 0.1001 | 0.1001 | 0.1001 | 0.1001 | 1 A     |
| 126.244 | 174.413 | 53.607 | 35.038 | 0.1001 | 0.1001 | 0.1001 | 0.1001 | 1 M     |
| 126.596 | 173.617 | 52.851 | 44.705 | 0.1001 | 0.1001 | 0.1001 | 0.1001 | 1 L     |
| 123.799 | 174.316 | 51.344 | 40.972 | 0.1001 | 0.1001 | 0.1001 | 0.1001 | 1 N     |
| 118.170 | 1111.1  | 65.629 | 31.806 | 0.1001 | 0.1001 | 0.1001 | 0.1001 | 1 P     |
| 111.984 | 177.231 | 58.643 | 33.171 | 0.1001 | 0.1001 | 0.1001 | 0.1001 | 1 K     |
| 115.814 | 175.562 | 52.965 | 42.473 | 0.1001 | 0.1001 | 0.1001 | 0.1001 | 1 L     |
| 115.145 | 175.297 | 56.598 | 28.918 | 0.1001 | 0.1001 | 0.1001 | 0.1001 | 1 K     |
| 119.758 | 173.961 | 53.788 | 37.483 | 0.1001 | 0.1001 | 0.1001 | 0.1001 | 1 K     |
| 119.077 | 175.482 | 53.883 | 35.855 | 0.1001 | 0.1001 | 0.1001 | 0.1001 | 1 K     |
| 121.189 | 175.477 | 56.100 | 42.734 | 0.1001 | 0.1001 | 0.1001 | 0.1001 | 1 F     |
| 120.881 | 172.010 | 59.961 | 64.433 | 0.1001 | 0.1001 | 0.1001 | 0.1001 | 1 S     |
| 127.573 | 174.874 | 57.775 | 38.001 | 0.1001 | 0.1001 | 0.1001 | 0.1001 | 1 I     |
| 121.993 | 174.806 | 56.120 | 41.139 | 0.1001 | 0.1001 | 0.1001 | 0.1001 | 1 Y     |
| 120.470 | 175.194 | 57.396 | 29.670 | 0.1001 | 0.1001 | 0.1001 | 0.1001 | 1 W     |
| 120.239 | 171.936 | 44.532 | 1111.1 | 0.1001 | 0.1001 | 0.1001 | 0.1001 | 1 G     |
| 118.828 | 176.174 | 49.913 | 18.955 | 0.1001 | 0.1001 | 0.1001 | 0.1001 | 1 A     |
| 121.051 | 175.990 | 53.030 | 41.508 | 0.1001 | 0.1001 | 0.1001 | 0.1001 | 1 D     |
| 119.568 | 177.296 | 55.183 | 39.837 | 0.1001 | 0.1001 | 0.1001 | 0.1001 | 1 D     |
| 121.961 | 1111.1  | 46.480 | 1111.1 | 0.1001 | 0.1001 | 0.1001 | 0.1001 | 1 G     |
| 114.325 | 174.308 | 61.079 | 32.911 | 0.1001 | 0.1001 | 0.1001 | 0.1001 | 1 V     |
| 125.031 | 172.465 | 43.458 | 1111.1 | 0.1001 | 0.1001 | 0.1001 | 0.1001 | 1 G     |
| 127.637 | 173.873 | 54.084 | 34.548 | 0.1001 | 0.1001 | 0.1001 | 0.1001 | 1 M     |
| 130.695 | 175.023 | 59.286 | 40.644 | 0.1001 | 0.1001 | 0.1001 | 0.1001 | 1 F     |
| 120.391 | 174.235 | 61.455 | 32.002 | 0.1001 | 0.1001 | 0.1001 | 0.1001 | 1 V     |
| 117.498 | 173.167 | 57.384 | 65.720 | 0.1001 | 0.1001 | 0.1001 | 0.1001 | 1 S     |
| 109.465 | 174.539 | 55.222 | 40.206 | 0.1001 | 0.1001 | 0.1001 | 0.1001 | 1 D     |
| 110.572 | 174.487 | 60.840 | 32.067 | 0.1001 | 0.1001 | 0.1001 | 0.1001 | 1 V     |
| 109.706 | 174.591 | 58.487 | 71.674 | 0.1001 | 0.1001 | 0.1001 | 0.1001 | 1 T     |
| 113.970 | 177.060 | 59.777 | 72.911 | 0.1001 | 0.1001 | 0.1001 | 0.1001 | 1 T     |
| 105.932 | 1111.1  | 64.658 | 29.665 | 0.1001 | 0.1001 | 0.1001 | 0.1001 | 1 P     |
| 109.826 | 176.253 | 58.086 | 62.950 | 0.1001 | 0.1001 | 0.1001 | 0.1001 | 1 S     |
| 105.805 | 175.832 | 45.213 | 1111.1 | 0.1001 | 0.1001 | 0.1001 | 0.1001 | 1 G     |
| 109.086 | 172.905 | 46.480 | 1111.1 | 0.1001 | 0.1001 | 0.1001 | 0.1001 | 1 G     |
| 127.776 | 172.807 | 43.642 | 1111.1 | 0.1001 | 0.1001 | 0.1001 | 0.1001 | 1 G     |
| 127.768 | 174.930 | 52.820 | 30.250 | 0.1001 | 0.1001 | 0.1001 | 0.1001 | 1 H     |
| 126.493 | 171.847 | 61.358 | 69.821 | 0.1001 | 0.1001 | 0.1001 | 0.1001 | 1 T     |

|         |         |        |        |        |        |        |        |   |   |
|---------|---------|--------|--------|--------|--------|--------|--------|---|---|
| 126.342 | 173.794 | 59.808 | 33.334 | 0.1001 | 0.1001 | 0.1001 | 0.1001 | 1 | V |
| 116.370 | 175.554 | 51.143 | 43.344 | 0.1001 | 0.1001 | 0.1001 | 0.1001 | 1 | L |
| 111.783 | 174.576 | 54.893 | 64.901 | 0.1001 | 0.1001 | 0.1001 | 0.1001 | 1 | S |
| 116.093 | 173.703 | 45.507 | 1111.1 | 0.1001 | 0.1001 | 0.1001 | 0.1001 | 1 | G |
| 117.894 | 177.319 | 56.016 | 29.310 | 0.1001 | 0.1001 | 0.1001 | 0.1001 | 1 | Q |
| 122.287 | 175.639 | 54.578 | 41.720 | 0.1001 | 0.1001 | 0.1001 | 0.1001 | 1 | L |
| 118.949 | 175.553 | 53.336 | 36.380 | 0.1001 | 0.1001 | 0.1001 | 0.1001 | 1 | K |
| 114.843 | 177.053 | 59.205 | 28.284 | 0.1001 | 0.1001 | 0.1001 | 0.1001 | 1 | E |
| 119.664 | 176.434 | 59.231 | 29.657 | 0.1001 | 0.1001 | 0.1001 | 0.1001 | 1 | K |
| 111.597 | 175.886 | 55.661 | 41.782 | 0.1001 | 0.1001 | 0.1001 | 0.1001 | 1 | D |
| 120.358 | 174.221 | 61.103 | 71.264 | 0.1001 | 0.1001 | 0.1001 | 0.1001 | 1 | T |
| 121.834 | 174.850 | 53.721 | 45.655 | 0.1001 | 0.1001 | 0.1001 | 0.1001 | 1 | L |
| 129.811 | 174.766 | 61.157 | 34.923 | 0.1001 | 0.1001 | 0.1001 | 0.1001 | 1 | V |
| 125.273 | 175.644 | 53.160 | 46.815 | 0.1001 | 0.1001 | 0.1001 | 0.1001 | 1 | L |
| 125.299 | 175.910 | 54.716 | 30.904 | 0.1001 | 0.1001 | 0.1001 | 0.1001 | 1 | E |
| 131.006 | 174.077 | 57.516 | 41.720 | 0.1001 | 0.1001 | 0.1001 | 0.1001 | 1 | Y |
| 109.843 | 171.773 | 54.613 | 39.659 | 0.1001 | 0.1001 | 0.1001 | 0.1001 | 1 | D |
| 119.021 | 173.995 | 54.528 | 37.383 | 0.1001 | 0.1001 | 0.1001 | 0.1001 | 1 | N |
| 117.141 | 174.644 | 55.133 | 36.460 | 0.1001 | 0.1001 | 0.1001 | 0.1001 | 1 | K |
| 127.333 | 172.823 | 61.745 | 69.709 | 0.1001 | 0.1001 | 0.1001 | 0.1001 | 1 | T |
| 117.709 | 174.313 | 56.764 | 41.054 | 0.1001 | 0.1001 | 0.1001 | 0.1001 | 1 | Y |
| 122.946 | 172.464 | 61.320 | 69.546 | 0.1001 | 0.1001 | 0.1001 | 0.1001 | 1 | T |
| 121.240 | 174.846 | 55.804 | 42.627 | 0.1001 | 0.1001 | 0.1001 | 0.1001 | 1 | Y |
| 128.525 | 177.060 | 54.073 | 33.787 | 0.1001 | 0.1001 | 0.1001 | 0.1001 | 1 | E |
| 127.221 | 176.261 | 64.664 | 37.472 | 0.1001 | 0.1001 | 0.1001 | 0.1001 | 1 | I |
| 120.717 | 174.674 | 54.632 | 31.165 | 0.1001 | 0.1001 | 0.1001 | 0.1001 | 1 | Q |
| 125.089 | 173.200 | 56.528 | 36.462 | 0.1001 | 0.1001 | 0.1001 | 0.1001 | 1 | K |
| 129.003 | 175.821 | 60.078 | 42.082 | 0.1001 | 0.1001 | 0.1001 | 0.1001 | 1 | I |
| 117.739 | 170.353 | 56.388 | 31.158 | 0.1001 | 0.1001 | 0.1001 | 0.1001 | 1 | W |
| 120.676 | 176.258 | 58.973 | 40.734 | 0.1001 | 0.1001 | 0.1001 | 0.1001 | 1 | I |
| 119.885 | 172.069 | 57.557 | 70.656 | 0.1001 | 0.1001 | 0.1001 | 0.1001 | 1 | T |
| 121.632 | 176.781 | 54.482 | 31.240 | 0.1001 | 0.1001 | 0.1001 | 0.1001 | 1 | H |
| 114.513 | 177.587 | 54.899 | 17.981 | 0.1001 | 0.1001 | 0.1001 | 0.1001 | 1 | A |
| 119.184 | 175.283 | 53.070 | 40.034 | 0.1001 | 0.1001 | 0.1001 | 0.1001 | 1 | D |
| 127.998 | 177.674 | 54.268 | 39.846 | 0.1001 | 0.1001 | 0.1001 | 0.1001 | 1 | D |
| 111.880 | 177.709 | 55.888 | 29.264 | 0.1001 | 0.1001 | 0.1001 | 0.1001 | 1 | R |
| 118.971 | 173.548 | 62.350 | 68.935 | 0.1001 | 0.1001 | 0.1001 | 0.1001 | 1 | T |
| 120.334 | 176.853 | 63.878 | 32.470 | 0.1001 | 0.1001 | 0.1001 | 0.1001 | 1 | V |
| 118.981 | 173.191 | 60.963 | 33.933 | 0.1001 | 0.1001 | 0.1001 | 0.1001 | 1 | I |
| 123.307 | 174.405 | 57.932 | 42.146 | 0.1001 | 0.1001 | 0.1001 | 0.1001 | 1 | I |
| 121.425 | 176.528 | 56.695 | 33.092 | 0.1001 | 0.1001 | 0.1001 | 0.1001 | 1 | K |
| 119.533 | 175.996 | 53.271 | 36.089 | 0.1001 | 0.1001 | 0.1001 | 0.1001 | 1 | K |
| 117.843 | 174.477 | 55.175 | 29.097 | 0.1001 | 0.1001 | 0.1001 | 0.1001 | 1 | E |
| 130.464 | 1111.1  | 62.352 | 30.706 | 0.1001 | 0.1001 | 0.1001 | 0.1001 | 1 | P |
| 128.504 | 172.992 | 56.976 | 41.420 | 0.1001 | 0.1001 | 0.1001 | 0.1001 | 1 | I |
| 125.436 | 174.488 | 52.062 | 45.447 | 0.1001 | 0.1001 | 0.1001 | 0.1001 | 1 | L |
| 128.310 | 173.169 | 60.596 | 68.558 | 0.1001 | 0.1001 | 0.1001 | 0.1001 | 1 | T |
| 117.635 | 174.404 | 52.439 | 44.373 | 0.1001 | 0.1001 | 0.1001 | 0.1001 | 1 | L |
| 116.149 | 172.735 | 57.360 | 70.136 | 0.1001 | 0.1001 | 0.1001 | 0.1001 | 1 | T |
| 114.938 | 176.083 | 58.918 | 38.624 | 0.1001 | 0.1001 | 0.1001 | 0.1001 | 1 | F |
| 121.170 | 175.285 | 51.974 | 39.454 | 0.1001 | 0.1001 | 0.1001 | 0.1001 | 1 | D |

|         |         |        |        |        |        |        |        |   |   |
|---------|---------|--------|--------|--------|--------|--------|--------|---|---|
| 127.293 | 175.022 | 58.734 | 39.330 | 0.1001 | 0.1001 | 0.1001 | 0.1001 | 1 | Y |
| 114.862 | 174.579 | 60.165 | 37.120 | 0.1001 | 0.1001 | 0.1001 | 0.1001 | 1 | I |
| 122.165 | 172.992 | 43.458 | 1111.1 | 0.1001 | 0.1001 | 0.1001 | 0.1001 | 1 | G |
| 129.087 | 174.579 | 53.344 | 39.979 | 0.1001 | 0.1001 | 0.1001 | 0.1001 | 1 | D |
| 120.986 | 175.988 | 53.067 | 45.102 | 0.1001 | 0.1001 | 0.1001 | 0.1001 | 1 | D |
| 127.342 | 172.288 | 53.958 | 33.787 | 0.1001 | 0.1001 | 0.1001 | 0.1001 | 1 | R |
| 128.458 | 173.811 | 57.419 | 40.515 | 0.1001 | 0.1001 | 0.1001 | 0.1001 | 1 | Y |
| 123.623 | 173.610 | 58.968 | 40.998 | 0.1001 | 0.1001 | 0.1001 | 0.1001 | 1 | I |
| 127.009 | 173.524 | 59.873 | 40.767 | 0.1001 | 0.1001 | 0.1001 | 0.1001 | 1 | I |
| 132.785 | 175.383 | 54.895 | 33.904 | 0.1001 | 0.1001 | 0.1001 | 0.1001 | 1 | E |
| 120.672 | 173.789 | 50.197 | 24.262 | 0.1001 | 0.1001 | 0.1001 | 0.1001 | 1 | A |
| 126.557 | 175.807 | 54.250 | 34.937 | 0.1001 | 0.1001 | 0.1001 | 0.1001 | 1 | K |
| 119.454 | 177.236 | 56.169 | 42.408 | 0.1001 | 0.1001 | 0.1001 | 0.1001 | 1 | L |
| 109.946 | 175.187 | 60.915 | 69.490 | 0.1001 | 0.1001 | 0.1001 | 0.1001 | 1 | T |
| 112.778 | 170.713 | 45.254 | 1111.1 | 0.1001 | 0.1001 | 0.1001 | 0.1001 | 1 | G |
| 119.351 | 173.178 | 56.393 | 65.587 | 0.1001 | 0.1001 | 0.1001 | 0.1001 | 1 | S |
| 117.533 | 174.580 | 56.413 | 40.096 | 0.1001 | 0.1001 | 0.1001 | 0.1001 | 1 | Y |
| 128.839 | 1111.1  | 58.000 | 63.905 | 0.1001 | 0.1001 | 0.1001 | 0.1001 | 1 | S |

Supporting Table S5: CONCA signal table for SrtC, with 0.1001 ppm chemical shift uncertainties and unambiguous residue-type assignments.

| N(i)    | CO(i-1) | CA(i)  | dN  | dCO    | dCA    | restype    |
|---------|---------|--------|-----|--------|--------|------------|
| 123.496 | 173.961 | 55.868 | 0.0 | 0.1001 | 0.1001 | 0.1001 1 E |
| 119.084 | 175.555 | 53.932 | 0.0 | 0.1001 | 0.1001 | 0.1001 1 H |
| 121.509 | 173.742 | 54.245 | 0.0 | 0.1001 | 0.1001 | 0.1001 1 K |
| 123.025 | 176.210 | 58.350 | 0.0 | 0.1001 | 0.1001 | 0.1001 1 E |
| 113.216 | 178.023 | 45.243 | 0.0 | 0.1001 | 0.1001 | 0.1001 1 G |
| 120.782 | 174.141 | 55.641 | 0.0 | 0.1001 | 0.1001 | 0.1001 1 E |
| 125.126 | 176.436 | 57.098 | 0.0 | 0.1001 | 0.1001 | 0.1001 1 K |
| 119.214 | 176.970 | 60.141 | 0.0 | 0.1001 | 0.1001 | 0.1001 1 V |
| 121.368 | 174.148 | 51.098 | 0.0 | 0.1001 | 0.1001 | 0.1001 1 A |
| 116.475 | 174.664 | 53.607 | 0.0 | 0.1001 | 0.1001 | 0.1001 1 M |
| 126.244 | 174.413 | 52.851 | 0.0 | 0.1001 | 0.1001 | 0.1001 1 L |
| 126.596 | 173.617 | 51.344 | 0.0 | 0.1001 | 0.1001 | 0.1001 1 N |
| 123.799 | 174.316 | 58.243 | 0.0 | 0.1001 | 0.1001 | 0.1001 1 I |
| 111.984 | 177.231 | 52.965 | 0.0 | 0.1001 | 0.1001 | 0.1001 1 L |
| 115.814 | 175.562 | 56.598 | 0.0 | 0.1001 | 0.1001 | 0.1001 1 K |
| 115.145 | 175.297 | 53.788 | 0.0 | 0.1001 | 0.1001 | 0.1001 1 K |
| 119.758 | 173.961 | 53.883 | 0.0 | 0.1001 | 0.1001 | 0.1001 1 K |
| 119.077 | 175.482 | 56.100 | 0.0 | 0.1001 | 0.1001 | 0.1001 1 F |
| 121.189 | 175.477 | 59.961 | 0.0 | 0.1001 | 0.1001 | 0.1001 1 S |
| 120.881 | 172.010 | 57.775 | 0.0 | 0.1001 | 0.1001 | 0.1001 1 I |
| 127.573 | 174.874 | 56.120 | 0.0 | 0.1001 | 0.1001 | 0.1001 1 Y |
| 121.993 | 174.806 | 57.396 | 0.0 | 0.1001 | 0.1001 | 0.1001 1 W |
| 120.470 | 175.194 | 44.532 | 0.0 | 0.1001 | 0.1001 | 0.1001 1 G |
| 120.239 | 171.936 | 49.913 | 0.0 | 0.1001 | 0.1001 | 0.1001 1 A |
| 118.828 | 176.174 | 53.030 | 0.0 | 0.1001 | 0.1001 | 0.1001 1 D |
| 121.051 | 175.990 | 55.183 | 0.0 | 0.1001 | 0.1001 | 0.1001 1 D |
| 119.568 | 177.296 | 53.967 | 0.0 | 0.1001 | 0.1001 | 0.1001 1 A |
| 114.325 | 174.308 | 43.458 | 0.0 | 0.1001 | 0.1001 | 0.1001 1 G |
| 125.031 | 172.465 | 54.084 | 0.0 | 0.1001 | 0.1001 | 0.1001 1 M |
| 127.637 | 173.873 | 59.286 | 0.0 | 0.1001 | 0.1001 | 0.1001 1 F |
| 130.695 | 175.023 | 61.455 | 0.0 | 0.1001 | 0.1001 | 0.1001 1 V |
| 120.391 | 174.235 | 57.384 | 0.0 | 0.1001 | 0.1001 | 0.1001 1 S |
| 117.498 | 173.167 | 55.222 | 0.0 | 0.1001 | 0.1001 | 0.1001 1 D |
| 109.465 | 174.539 | 60.840 | 0.0 | 0.1001 | 0.1001 | 0.1001 1 V |
| 110.572 | 174.487 | 58.487 | 0.0 | 0.1001 | 0.1001 | 0.1001 1 T |
| 109.706 | 174.591 | 59.777 | 0.0 | 0.1001 | 0.1001 | 0.1001 1 T |
| 113.970 | 177.060 | 60.920 | 0.0 | 0.1001 | 0.1001 | 0.1001 1 T |
| 109.826 | 176.253 | 45.213 | 0.0 | 0.1001 | 0.1001 | 0.1001 1 G |
| 105.805 | 175.832 | 46.480 | 0.0 | 0.1001 | 0.1001 | 0.1001 1 G |
| 109.086 | 172.905 | 43.642 | 0.0 | 0.1001 | 0.1001 | 0.1001 1 G |
| 127.776 | 172.807 | 52.820 | 0.0 | 0.1001 | 0.1001 | 0.1001 1 H |
| 127.768 | 174.930 | 61.358 | 0.0 | 0.1001 | 0.1001 | 0.1001 1 T |
| 126.493 | 171.847 | 59.808 | 0.0 | 0.1001 | 0.1001 | 0.1001 1 V |
| 126.342 | 173.794 | 51.143 | 0.0 | 0.1001 | 0.1001 | 0.1001 1 L |
| 116.370 | 175.554 | 54.893 | 0.0 | 0.1001 | 0.1001 | 0.1001 1 S |
| 111.783 | 174.576 | 45.547 | 0.0 | 0.1001 | 0.1001 | 0.1001 1 G |
| 116.093 | 173.703 | 56.016 | 0.0 | 0.1001 | 0.1001 | 0.1001 1 Q |

|         |         |        |     |        |        |        |        |   |   |
|---------|---------|--------|-----|--------|--------|--------|--------|---|---|
| 117.894 | 177.319 | 54.578 | 0.0 | 0.1001 | 0.1001 | 0.1001 | 0.1001 | 1 | L |
| 122.287 | 175.639 | 53.336 | 0.0 | 0.1001 | 0.1001 | 0.1001 | 0.1001 | 1 | K |
| 118.949 | 175.553 | 59.205 | 0.0 | 0.1001 | 0.1001 | 0.1001 | 0.1001 | 1 | E |
| 114.843 | 177.053 | 59.231 | 0.0 | 0.1001 | 0.1001 | 0.1001 | 0.1001 | 1 | K |
| 119.664 | 176.434 | 55.661 | 0.0 | 0.1001 | 0.1001 | 0.1001 | 0.1001 | 1 | D |
| 111.597 | 175.886 | 61.103 | 0.0 | 0.1001 | 0.1001 | 0.1001 | 0.1001 | 1 | T |
| 120.358 | 174.221 | 53.721 | 0.0 | 0.1001 | 0.1001 | 0.1001 | 0.1001 | 1 | L |
| 121.834 | 174.850 | 61.157 | 0.0 | 0.1001 | 0.1001 | 0.1001 | 0.1001 | 1 | V |
| 129.811 | 174.766 | 53.160 | 0.0 | 0.1001 | 0.1001 | 0.1001 | 0.1001 | 1 | L |
| 125.273 | 175.644 | 54.716 | 0.0 | 0.1001 | 0.1001 | 0.1001 | 0.1001 | 1 | E |
| 125.299 | 175.910 | 57.516 | 0.0 | 0.1001 | 0.1001 | 0.1001 | 0.1001 | 1 | Y |
| 131.006 | 174.077 | 54.613 | 0.0 | 0.1001 | 0.1001 | 0.1001 | 0.1001 | 1 | D |
| 109.843 | 171.773 | 54.528 | 0.0 | 0.1001 | 0.1001 | 0.1001 | 0.1001 | 1 | N |
| 119.021 | 173.995 | 55.133 | 0.0 | 0.1001 | 0.1001 | 0.1001 | 0.1001 | 1 | K |
| 117.141 | 174.644 | 61.745 | 0.0 | 0.1001 | 0.1001 | 0.1001 | 0.1001 | 1 | T |
| 127.333 | 172.823 | 56.764 | 0.0 | 0.1001 | 0.1001 | 0.1001 | 0.1001 | 1 | Y |
| 117.709 | 174.313 | 61.320 | 0.0 | 0.1001 | 0.1001 | 0.1001 | 0.1001 | 1 | T |
| 122.946 | 172.464 | 55.804 | 0.0 | 0.1001 | 0.1001 | 0.1001 | 0.1001 | 1 | Y |
| 121.240 | 174.846 | 54.073 | 0.0 | 0.1001 | 0.1001 | 0.1001 | 0.1001 | 1 | E |
| 128.525 | 177.060 | 64.664 | 0.0 | 0.1001 | 0.1001 | 0.1001 | 0.1001 | 1 | I |
| 127.221 | 176.261 | 54.632 | 0.0 | 0.1001 | 0.1001 | 0.1001 | 0.1001 | 1 | Q |
| 120.717 | 174.674 | 56.528 | 0.0 | 0.1001 | 0.1001 | 0.1001 | 0.1001 | 1 | K |
| 125.089 | 173.200 | 60.078 | 0.0 | 0.1001 | 0.1001 | 0.1001 | 0.1001 | 1 | I |
| 129.003 | 175.821 | 56.388 | 0.0 | 0.1001 | 0.1001 | 0.1001 | 0.1001 | 1 | W |
| 117.739 | 170.353 | 58.973 | 0.0 | 0.1001 | 0.1001 | 0.1001 | 0.1001 | 1 | I |
| 120.676 | 176.258 | 57.557 | 0.0 | 0.1001 | 0.1001 | 0.1001 | 0.1001 | 1 | T |
| 119.885 | 172.069 | 54.482 | 0.0 | 0.1001 | 0.1001 | 0.1001 | 0.1001 | 1 | H |
| 121.632 | 176.781 | 54.899 | 0.0 | 0.1001 | 0.1001 | 0.1001 | 0.1001 | 1 | A |
| 114.513 | 177.587 | 53.070 | 0.0 | 0.1001 | 0.1001 | 0.1001 | 0.1001 | 1 | D |
| 119.184 | 175.283 | 54.268 | 0.0 | 0.1001 | 0.1001 | 0.1001 | 0.1001 | 1 | D |
| 127.998 | 177.674 | 55.888 | 0.0 | 0.1001 | 0.1001 | 0.1001 | 0.1001 | 1 | R |
| 111.880 | 177.709 | 62.350 | 0.0 | 0.1001 | 0.1001 | 0.1001 | 0.1001 | 1 | T |
| 118.971 | 173.548 | 63.878 | 0.0 | 0.1001 | 0.1001 | 0.1001 | 0.1001 | 1 | V |
| 120.334 | 176.853 | 60.963 | 0.0 | 0.1001 | 0.1001 | 0.1001 | 0.1001 | 1 | I |
| 118.981 | 173.191 | 57.932 | 0.0 | 0.1001 | 0.1001 | 0.1001 | 0.1001 | 1 | I |
| 123.307 | 174.405 | 56.695 | 0.0 | 0.1001 | 0.1001 | 0.1001 | 0.1001 | 1 | K |
| 121.425 | 176.528 | 53.271 | 0.0 | 0.1001 | 0.1001 | 0.1001 | 0.1001 | 1 | K |
| 119.533 | 175.996 | 55.175 | 0.0 | 0.1001 | 0.1001 | 0.1001 | 0.1001 | 1 | E |
| 117.843 | 174.477 | 52.633 | 0.0 | 0.1001 | 0.1001 | 0.1001 | 0.1001 | 1 | E |
| 128.504 | 172.992 | 52.062 | 0.0 | 0.1001 | 0.1001 | 0.1001 | 0.1001 | 1 | L |
| 125.436 | 174.488 | 60.596 | 0.0 | 0.1001 | 0.1001 | 0.1001 | 0.1001 | 1 | T |
| 128.310 | 173.169 | 52.439 | 0.0 | 0.1001 | 0.1001 | 0.1001 | 0.1001 | 1 | L |
| 117.635 | 174.404 | 57.360 | 0.0 | 0.1001 | 0.1001 | 0.1001 | 0.1001 | 1 | T |
| 116.149 | 172.735 | 59.550 | 0.0 | 0.1001 | 0.1001 | 0.1001 | 0.1001 | 1 | T |
| 114.938 | 176.083 | 51.974 | 0.0 | 0.1001 | 0.1001 | 0.1001 | 0.1001 | 1 | D |
| 121.170 | 175.285 | 58.734 | 0.0 | 0.1001 | 0.1001 | 0.1001 | 0.1001 | 1 | Y |
| 127.293 | 175.022 | 60.165 | 0.0 | 0.1001 | 0.1001 | 0.1001 | 0.1001 | 1 | I |
| 114.862 | 174.579 | 43.458 | 0.0 | 0.1001 | 0.1001 | 0.1001 | 0.1001 | 1 | G |
| 122.165 | 172.992 | 53.344 | 0.0 | 0.1001 | 0.1001 | 0.1001 | 0.1001 | 1 | D |
| 129.087 | 174.579 | 50.186 | 0.0 | 0.1001 | 0.1001 | 0.1001 | 0.1001 | 1 | A |
| 120.986 | 175.988 | 53.958 | 0.0 | 0.1001 | 0.1001 | 0.1001 | 0.1001 | 1 | R |

|         |         |        |     |        |        |        |        |   |   |
|---------|---------|--------|-----|--------|--------|--------|--------|---|---|
| 127.342 | 172.288 | 57.419 | 0.0 | 0.1001 | 0.1001 | 0.1001 | 0.1001 | 1 | Y |
| 128.458 | 173.811 | 58.968 | 0.0 | 0.1001 | 0.1001 | 0.1001 | 0.1001 | 1 | I |
| 123.623 | 173.610 | 59.873 | 0.0 | 0.1001 | 0.1001 | 0.1001 | 0.1001 | 1 | I |
| 127.009 | 173.524 | 54.895 | 0.0 | 0.1001 | 0.1001 | 0.1001 | 0.1001 | 1 | E |
| 132.785 | 175.383 | 50.197 | 0.0 | 0.1001 | 0.1001 | 0.1001 | 0.1001 | 1 | A |
| 120.672 | 173.789 | 54.250 | 0.0 | 0.1001 | 0.1001 | 0.1001 | 0.1001 | 1 | K |
| 126.557 | 175.807 | 56.169 | 0.0 | 0.1001 | 0.1001 | 0.1001 | 0.1001 | 1 | L |
| 119.454 | 177.236 | 60.915 | 0.0 | 0.1001 | 0.1001 | 0.1001 | 0.1001 | 1 | T |
| 109.946 | 175.187 | 45.254 | 0.0 | 0.1001 | 0.1001 | 0.1001 | 0.1001 | 1 | G |
| 112.778 | 170.713 | 56.393 | 0.0 | 0.1001 | 0.1001 | 0.1001 | 0.1001 | 1 | S |
| 119.351 | 173.178 | 56.413 | 0.0 | 0.1001 | 0.1001 | 0.1001 | 0.1001 | 1 | Y |
| 117.533 | 174.580 | 58.000 | 0.0 | 0.1001 | 0.1001 | 0.1001 | 0.1001 | 1 | S |



Supporting Table S6: CANCA signal table for SrtC, with 0.1001 ppm chemical shift uncertainties and unambiguous residue-type assignments.

| N(i)    | CA(i)  | CA(i-1) | dN  | dCA    | dCA    | restype    |
|---------|--------|---------|-----|--------|--------|------------|
| 115.244 | 61.486 | 55.218  | 0.0 | 0.1001 | 0.1001 | 0.1001 1 T |
| 123.496 | 55.868 | 61.486  | 0.0 | 0.1001 | 0.1001 | 0.1001 1 E |
| 119.084 | 53.932 | 55.868  | 0.0 | 0.1001 | 0.1001 | 0.1001 1 H |
| 121.509 | 54.245 | 53.932  | 0.0 | 0.1001 | 0.1001 | 0.1001 1 K |
| 123.025 | 58.350 | 54.245  | 0.0 | 0.1001 | 0.1001 | 0.1001 1 E |
| 113.216 | 45.243 | 58.350  | 0.0 | 0.1001 | 0.1001 | 0.1001 1 G |
| 120.782 | 55.641 | 45.243  | 0.0 | 0.1001 | 0.1001 | 0.1001 1 E |
| 125.126 | 57.098 | 55.641  | 0.0 | 0.1001 | 0.1001 | 0.1001 1 K |
| 119.214 | 60.141 | 57.098  | 0.0 | 0.1001 | 0.1001 | 0.1001 1 V |
| 121.368 | 51.098 | 60.141  | 0.0 | 0.1001 | 0.1001 | 0.1001 1 A |
| 116.475 | 53.607 | 51.098  | 0.0 | 0.1001 | 0.1001 | 0.1001 1 M |
| 126.244 | 52.851 | 53.607  | 0.0 | 0.1001 | 0.1001 | 0.1001 1 L |
| 126.596 | 51.344 | 52.851  | 0.0 | 0.1001 | 0.1001 | 0.1001 1 N |
| 123.799 | 58.243 | 51.344  | 0.0 | 0.1001 | 0.1001 | 0.1001 1 I |
| 118.170 | 58.643 | 65.629  | 0.0 | 0.1001 | 0.1001 | 0.1001 1 K |
| 111.984 | 52.965 | 58.643  | 0.0 | 0.1001 | 0.1001 | 0.1001 1 L |
| 115.814 | 56.598 | 52.965  | 0.0 | 0.1001 | 0.1001 | 0.1001 1 K |
| 115.145 | 53.788 | 56.598  | 0.0 | 0.1001 | 0.1001 | 0.1001 1 K |
| 119.758 | 53.883 | 53.788  | 0.0 | 0.1001 | 0.1001 | 0.1001 1 K |
| 119.077 | 56.100 | 53.883  | 0.0 | 0.1001 | 0.1001 | 0.1001 1 F |
| 121.189 | 59.961 | 56.100  | 0.0 | 0.1001 | 0.1001 | 0.1001 1 S |
| 120.881 | 57.775 | 59.961  | 0.0 | 0.1001 | 0.1001 | 0.1001 1 I |
| 127.573 | 56.120 | 57.775  | 0.0 | 0.1001 | 0.1001 | 0.1001 1 Y |
| 121.993 | 57.396 | 56.120  | 0.0 | 0.1001 | 0.1001 | 0.1001 1 W |
| 120.470 | 44.532 | 57.396  | 0.0 | 0.1001 | 0.1001 | 0.1001 1 G |
| 120.239 | 49.913 | 44.532  | 0.0 | 0.1001 | 0.1001 | 0.1001 1 A |
| 118.828 | 53.030 | 49.913  | 0.0 | 0.1001 | 0.1001 | 0.1001 1 D |
| 121.051 | 55.183 | 53.030  | 0.0 | 0.1001 | 0.1001 | 0.1001 1 D |
| 119.568 | 53.967 | 55.183  | 0.0 | 0.1001 | 0.1001 | 0.1001 1 A |
| 121.961 | 61.079 | 46.480  | 0.0 | 0.1001 | 0.1001 | 0.1001 1 V |
| 114.325 | 43.458 | 61.079  | 0.0 | 0.1001 | 0.1001 | 0.1001 1 G |
| 125.031 | 54.084 | 43.458  | 0.0 | 0.1001 | 0.1001 | 0.1001 1 M |
| 127.637 | 59.286 | 54.084  | 0.0 | 0.1001 | 0.1001 | 0.1001 1 F |
| 130.695 | 61.455 | 59.286  | 0.0 | 0.1001 | 0.1001 | 0.1001 1 V |
| 120.391 | 57.384 | 61.455  | 0.0 | 0.1001 | 0.1001 | 0.1001 1 S |
| 117.498 | 55.222 | 57.384  | 0.0 | 0.1001 | 0.1001 | 0.1001 1 D |
| 109.465 | 60.840 | 55.222  | 0.0 | 0.1001 | 0.1001 | 0.1001 1 V |
| 110.572 | 58.487 | 60.840  | 0.0 | 0.1001 | 0.1001 | 0.1001 1 T |
| 109.706 | 59.777 | 58.487  | 0.0 | 0.1001 | 0.1001 | 0.1001 1 T |
| 113.970 | 60.920 | 59.777  | 0.0 | 0.1001 | 0.1001 | 0.1001 1 T |
| 105.932 | 58.086 | 64.658  | 0.0 | 0.1001 | 0.1001 | 0.1001 1 S |
| 109.826 | 45.213 | 58.086  | 0.0 | 0.1001 | 0.1001 | 0.1001 1 G |
| 105.805 | 46.480 | 45.213  | 0.0 | 0.1001 | 0.1001 | 0.1001 1 G |
| 109.086 | 43.642 | 46.480  | 0.0 | 0.1001 | 0.1001 | 0.1001 1 G |
| 127.776 | 52.820 | 43.642  | 0.0 | 0.1001 | 0.1001 | 0.1001 1 H |
| 127.768 | 61.358 | 52.820  | 0.0 | 0.1001 | 0.1001 | 0.1001 1 T |
| 126.493 | 59.808 | 61.358  | 0.0 | 0.1001 | 0.1001 | 0.1001 1 V |

|         |        |        |     |        |        |        |        |   |   |
|---------|--------|--------|-----|--------|--------|--------|--------|---|---|
| 126.342 | 51.143 | 59.808 | 0.0 | 0.1001 | 0.1001 | 0.1001 | 0.1001 | 1 | L |
| 116.370 | 54.893 | 51.143 | 0.0 | 0.1001 | 0.1001 | 0.1001 | 0.1001 | 1 | S |
| 111.783 | 45.547 | 54.893 | 0.0 | 0.1001 | 0.1001 | 0.1001 | 0.1001 | 1 | G |
| 116.093 | 56.016 | 45.507 | 0.0 | 0.1001 | 0.1001 | 0.1001 | 0.1001 | 1 | Q |
| 117.894 | 54.578 | 56.016 | 0.0 | 0.1001 | 0.1001 | 0.1001 | 0.1001 | 1 | L |
| 122.287 | 53.336 | 54.578 | 0.0 | 0.1001 | 0.1001 | 0.1001 | 0.1001 | 1 | K |
| 118.949 | 59.205 | 53.336 | 0.0 | 0.1001 | 0.1001 | 0.1001 | 0.1001 | 1 | E |
| 114.843 | 59.231 | 59.205 | 0.0 | 0.1001 | 0.1001 | 0.1001 | 0.1001 | 1 | K |
| 119.664 | 55.661 | 59.231 | 0.0 | 0.1001 | 0.1001 | 0.1001 | 0.1001 | 1 | D |
| 111.597 | 61.103 | 55.661 | 0.0 | 0.1001 | 0.1001 | 0.1001 | 0.1001 | 1 | T |
| 120.358 | 53.721 | 61.103 | 0.0 | 0.1001 | 0.1001 | 0.1001 | 0.1001 | 1 | L |
| 121.834 | 61.157 | 53.721 | 0.0 | 0.1001 | 0.1001 | 0.1001 | 0.1001 | 1 | V |
| 129.811 | 53.160 | 61.157 | 0.0 | 0.1001 | 0.1001 | 0.1001 | 0.1001 | 1 | L |
| 125.273 | 54.716 | 53.160 | 0.0 | 0.1001 | 0.1001 | 0.1001 | 0.1001 | 1 | E |
| 125.299 | 57.516 | 54.716 | 0.0 | 0.1001 | 0.1001 | 0.1001 | 0.1001 | 1 | Y |
| 131.006 | 54.613 | 57.516 | 0.0 | 0.1001 | 0.1001 | 0.1001 | 0.1001 | 1 | D |
| 109.843 | 54.528 | 54.613 | 0.0 | 0.1001 | 0.1001 | 0.1001 | 0.1001 | 1 | N |
| 119.021 | 55.133 | 54.528 | 0.0 | 0.1001 | 0.1001 | 0.1001 | 0.1001 | 1 | K |
| 117.141 | 61.745 | 55.133 | 0.0 | 0.1001 | 0.1001 | 0.1001 | 0.1001 | 1 | T |
| 127.333 | 56.764 | 61.745 | 0.0 | 0.1001 | 0.1001 | 0.1001 | 0.1001 | 1 | Y |
| 117.709 | 61.320 | 56.764 | 0.0 | 0.1001 | 0.1001 | 0.1001 | 0.1001 | 1 | T |
| 122.946 | 55.804 | 61.320 | 0.0 | 0.1001 | 0.1001 | 0.1001 | 0.1001 | 1 | Y |
| 121.240 | 54.073 | 55.804 | 0.0 | 0.1001 | 0.1001 | 0.1001 | 0.1001 | 1 | E |
| 128.525 | 64.664 | 54.073 | 0.0 | 0.1001 | 0.1001 | 0.1001 | 0.1001 | 1 | I |
| 127.221 | 54.632 | 64.664 | 0.0 | 0.1001 | 0.1001 | 0.1001 | 0.1001 | 1 | Q |
| 120.717 | 56.528 | 54.632 | 0.0 | 0.1001 | 0.1001 | 0.1001 | 0.1001 | 1 | K |
| 125.089 | 60.078 | 56.528 | 0.0 | 0.1001 | 0.1001 | 0.1001 | 0.1001 | 1 | I |
| 129.003 | 56.388 | 60.078 | 0.0 | 0.1001 | 0.1001 | 0.1001 | 0.1001 | 1 | W |
| 117.739 | 58.973 | 56.388 | 0.0 | 0.1001 | 0.1001 | 0.1001 | 0.1001 | 1 | I |
| 120.676 | 57.557 | 58.973 | 0.0 | 0.1001 | 0.1001 | 0.1001 | 0.1001 | 1 | T |
| 119.885 | 54.482 | 57.557 | 0.0 | 0.1001 | 0.1001 | 0.1001 | 0.1001 | 1 | H |
| 121.632 | 54.899 | 54.482 | 0.0 | 0.1001 | 0.1001 | 0.1001 | 0.1001 | 1 | A |
| 114.513 | 53.070 | 54.899 | 0.0 | 0.1001 | 0.1001 | 0.1001 | 0.1001 | 1 | D |
| 119.184 | 54.268 | 53.070 | 0.0 | 0.1001 | 0.1001 | 0.1001 | 0.1001 | 1 | D |
| 127.998 | 55.888 | 54.268 | 0.0 | 0.1001 | 0.1001 | 0.1001 | 0.1001 | 1 | R |
| 111.880 | 62.350 | 55.888 | 0.0 | 0.1001 | 0.1001 | 0.1001 | 0.1001 | 1 | T |
| 118.971 | 63.878 | 62.350 | 0.0 | 0.1001 | 0.1001 | 0.1001 | 0.1001 | 1 | V |
| 120.334 | 60.963 | 63.878 | 0.0 | 0.1001 | 0.1001 | 0.1001 | 0.1001 | 1 | I |
| 118.981 | 57.932 | 60.963 | 0.0 | 0.1001 | 0.1001 | 0.1001 | 0.1001 | 1 | I |
| 123.307 | 56.695 | 57.932 | 0.0 | 0.1001 | 0.1001 | 0.1001 | 0.1001 | 1 | K |
| 121.425 | 53.271 | 56.695 | 0.0 | 0.1001 | 0.1001 | 0.1001 | 0.1001 | 1 | K |
| 119.533 | 55.175 | 53.271 | 0.0 | 0.1001 | 0.1001 | 0.1001 | 0.1001 | 1 | E |
| 117.843 | 52.633 | 55.175 | 0.0 | 0.1001 | 0.1001 | 0.1001 | 0.1001 | 1 | E |
| 130.464 | 56.976 | 52.633 | 0.0 | 0.1001 | 0.1001 | 0.1001 | 0.1001 | 1 | I |
| 128.504 | 52.062 | 56.976 | 0.0 | 0.1001 | 0.1001 | 0.1001 | 0.1001 | 1 | L |
| 125.436 | 60.596 | 52.062 | 0.0 | 0.1001 | 0.1001 | 0.1001 | 0.1001 | 1 | T |
| 128.310 | 52.439 | 60.596 | 0.0 | 0.1001 | 0.1001 | 0.1001 | 0.1001 | 1 | L |
| 117.635 | 57.360 | 52.439 | 0.0 | 0.1001 | 0.1001 | 0.1001 | 0.1001 | 1 | T |
| 116.149 | 59.550 | 57.360 | 0.0 | 0.1001 | 0.1001 | 0.1001 | 0.1001 | 1 | T |
| 114.938 | 51.974 | 58.918 | 0.0 | 0.1001 | 0.1001 | 0.1001 | 0.1001 | 1 | D |
| 121.170 | 58.734 | 51.974 | 0.0 | 0.1001 | 0.1001 | 0.1001 | 0.1001 | 1 | Y |

|         |        |        |     |        |        |        |        |   |   |
|---------|--------|--------|-----|--------|--------|--------|--------|---|---|
| 127.293 | 60.165 | 58.734 | 0.0 | 0.1001 | 0.1001 | 0.1001 | 0.1001 | 1 | I |
| 114.862 | 43.458 | 60.165 | 0.0 | 0.1001 | 0.1001 | 0.1001 | 0.1001 | 1 | G |
| 122.165 | 53.344 | 43.458 | 0.0 | 0.1001 | 0.1001 | 0.1001 | 0.1001 | 1 | D |
| 129.087 | 50.186 | 53.344 | 0.0 | 0.1001 | 0.1001 | 0.1001 | 0.1001 | 1 | A |
| 120.986 | 53.958 | 53.067 | 0.0 | 0.1001 | 0.1001 | 0.1001 | 0.1001 | 1 | R |
| 127.342 | 57.419 | 53.958 | 0.0 | 0.1001 | 0.1001 | 0.1001 | 0.1001 | 1 | Y |
| 128.458 | 58.968 | 57.419 | 0.0 | 0.1001 | 0.1001 | 0.1001 | 0.1001 | 1 | I |
| 123.623 | 59.873 | 58.968 | 0.0 | 0.1001 | 0.1001 | 0.1001 | 0.1001 | 1 | I |
| 127.009 | 54.895 | 59.873 | 0.0 | 0.1001 | 0.1001 | 0.1001 | 0.1001 | 1 | E |
| 132.785 | 50.197 | 54.895 | 0.0 | 0.1001 | 0.1001 | 0.1001 | 0.1001 | 1 | A |
| 120.672 | 54.250 | 50.197 | 0.0 | 0.1001 | 0.1001 | 0.1001 | 0.1001 | 1 | K |
| 126.557 | 56.169 | 54.250 | 0.0 | 0.1001 | 0.1001 | 0.1001 | 0.1001 | 1 | L |
| 119.454 | 60.915 | 56.169 | 0.0 | 0.1001 | 0.1001 | 0.1001 | 0.1001 | 1 | T |
| 109.946 | 45.254 | 60.915 | 0.0 | 0.1001 | 0.1001 | 0.1001 | 0.1001 | 1 | G |
| 112.778 | 56.393 | 45.254 | 0.0 | 0.1001 | 0.1001 | 0.1001 | 0.1001 | 1 | S |
| 119.351 | 56.413 | 56.393 | 0.0 | 0.1001 | 0.1001 | 0.1001 | 0.1001 | 1 | Y |
| 117.533 | 58.000 | 56.413 | 0.0 | 0.1001 | 0.1001 | 0.1001 | 0.1001 | 1 | S |
| 128.839 | 57.693 | 58.000 | 0.0 | 0.1001 | 0.1001 | 0.1001 | 0.1001 | 1 | K |

Supporting Table S7: NCACX signal table for MLKL, with 0.1001 ppm chemical shift uncertainties and unambiguous residue-type assignments. (A shift value of 1111.1 indicates absent data.)

| N(i)    | CO(i)   | CA(i)  | CB(i)  | dN     | dCO    | dCA    | dCB    | restype |
|---------|---------|--------|--------|--------|--------|--------|--------|---------|
| 121.100 | 179.300 | 57.900 | 40.800 | 0.1001 | 0.1001 | 0.1001 | 0.1001 | 1 L     |
| 120.000 | 178.400 | 59.400 | 29.200 | 0.1001 | 0.1001 | 0.1001 | 0.1001 | 1 E     |
| 117.300 | 177.900 | 55.800 | 39.000 | 0.1001 | 0.1001 | 0.1001 | 0.1001 | 1 N     |
| 119.700 | 177.900 | 58.400 | 42.000 | 0.1001 | 0.1001 | 0.1001 | 0.1001 | 1 L     |
| 118.200 | 179.200 | 60.000 | 31.900 | 0.1001 | 0.1001 | 0.1001 | 0.1001 | 1 K     |
| 118.400 | 178.200 | 59.100 | 30.900 | 0.1001 | 0.1001 | 0.1001 | 0.1001 | 1 H     |
| 120.300 | 176.500 | 66.000 | 38.700 | 0.1001 | 0.1001 | 0.1001 | 0.1001 | 1 I     |
| 120.200 | 178.000 | 65.800 | 38.600 | 0.1001 | 0.1001 | 0.1001 | 0.1001 | 1 I     |
| 115.400 | 176.300 | 66.900 | 68.800 | 0.1001 | 0.1001 | 0.1001 | 0.1001 | 1 T     |
| 122.100 | 178.800 | 57.900 | 42.300 | 0.1001 | 0.1001 | 0.1001 | 0.1001 | 1 L     |
| 105.800 | 174.700 | 47.500 | 1111.1 | 0.1001 | 0.1001 | 0.1001 | 0.1001 | 1 G     |
| 119.600 | 179.600 | 59.300 | 27.900 | 0.1001 | 0.1001 | 0.1001 | 0.1001 | 1 Q     |
| 122.600 | 178.500 | 66.700 | 31.900 | 0.1001 | 0.1001 | 0.1001 | 0.1001 | 1 V     |
| 121.000 | 177.700 | 65.800 | 38.400 | 0.1001 | 0.1001 | 0.1001 | 0.1001 | 1 I     |
| 118.900 | 176.200 | 61.300 | 30.000 | 0.1001 | 0.1001 | 0.1001 | 0.1001 | 1 H     |
| 118.500 | 179.200 | 59.500 | 32.500 | 0.1001 | 0.1001 | 0.1001 | 0.1001 | 1 K     |
| 117.600 | 180.600 | 59.200 | 30.500 | 0.1001 | 0.1001 | 0.1001 | 0.1001 | 1 R     |
| 118.100 | 177.300 | 65.900 | 27.600 | 0.1001 | 0.1001 | 0.1001 | 0.1001 | 1 C     |
| 117.900 | 177.100 | 58.300 | 30.000 | 0.1001 | 0.1001 | 0.1001 | 0.1001 | 1 E     |
| 115.400 | 177.100 | 55.900 | 30.600 | 0.1001 | 0.1001 | 0.1001 | 0.1001 | 1 E     |
| 120.500 | 177.800 | 56.400 | 33.300 | 0.1001 | 0.1001 | 0.1001 | 0.1001 | 1 M     |
| 120.500 | 175.400 | 57.000 | 33.600 | 0.1001 | 0.1001 | 0.1001 | 0.1001 | 1 K     |
| 115.500 | 173.700 | 55.000 | 41.900 | 0.1001 | 0.1001 | 0.1001 | 0.1001 | 1 Y     |
| 113.600 | 174.700 | 60.400 | 26.100 | 0.1001 | 0.1001 | 0.1001 | 0.1001 | 1 C     |
| 115.800 | 179.800 | 60.700 | 33.300 | 0.1001 | 0.1001 | 0.1001 | 0.1001 | 1 K     |
| 121.000 | 181.300 | 59.000 | 30.400 | 0.1001 | 0.1001 | 0.1001 | 0.1001 | 1 K     |
| 120.500 | 180.200 | 59.300 | 32.100 | 0.1001 | 0.1001 | 0.1001 | 0.1001 | 1 Q     |
| 118.800 | 176.200 | 64.300 | 26.800 | 0.1001 | 0.1001 | 0.1001 | 0.1001 | 1 C     |
| 119.300 | 178.900 | 59.300 | 29.200 | 0.1001 | 0.1001 | 0.1001 | 0.1001 | 1 R     |
| 119.700 | 178.000 | 58.200 | 29.100 | 0.1001 | 0.1001 | 0.1001 | 0.1001 | 1 R     |
| 120.600 | 178.400 | 58.300 | 40.200 | 0.1001 | 0.1001 | 0.1001 | 0.1001 | 1 L     |
| 105.200 | 175.600 | 48.400 | 1111.1 | 0.1001 | 0.1001 | 0.1001 | 0.1001 | 1 G     |
| 120.500 | 179.400 | 59.600 | 30.600 | 0.1001 | 0.1001 | 0.1001 | 0.1001 | 1 H     |
| 121.900 | 179.600 | 59.500 | 30.100 | 0.1001 | 0.1001 | 0.1001 | 0.1001 | 1 R     |
| 118.500 | 177.600 | 67.800 | 31.300 | 0.1001 | 0.1001 | 0.1001 | 0.1001 | 1 V     |
| 118.300 | 179.600 | 58.000 | 41.400 | 0.1001 | 0.1001 | 0.1001 | 0.1001 | 1 L     |
| 104.900 | 175.700 | 46.700 | 1111.1 | 0.1001 | 0.1001 | 0.1001 | 0.1001 | 1 G     |
| 120.500 | 176.900 | 56.500 | 41.600 | 0.1001 | 0.1001 | 0.1001 | 0.1001 | 1 L     |
| 108.700 | 178.100 | 62.700 | 38.500 | 0.1001 | 0.1001 | 0.1001 | 0.1001 | 1 I     |
| 122.800 | 1111.1  | 60.700 | 29.400 | 0.1001 | 0.1001 | 0.1001 | 0.1001 | 1 K     |
| 114.400 | 178.800 | 57.100 | 40.300 | 0.1001 | 0.1001 | 0.1001 | 0.1001 | 1 L     |
| 119.200 | 179.100 | 59.500 | 30.100 | 0.1001 | 0.1001 | 0.1001 | 0.1001 | 1 E     |
| 116.500 | 177.900 | 57.600 | 32.500 | 0.1001 | 0.1001 | 0.1001 | 0.1001 | 1 M     |
| 119.900 | 178.000 | 56.600 | 42.000 | 0.1001 | 0.1001 | 0.1001 | 0.1001 | 1 L     |
| 118.300 | 176.500 | 57.700 | 29.500 | 0.1001 | 0.1001 | 0.1001 | 0.1001 | 1 Q     |
| 119.000 | 176.900 | 55.300 | 41.300 | 0.1001 | 0.1001 | 0.1001 | 0.1001 | 1 D     |
| 119.500 | 177.200 | 56.700 | 29.300 | 0.1001 | 0.1001 | 0.1001 | 0.1001 | 1 Q     |

|         |         |        |        |        |        |        |        |   |   |
|---------|---------|--------|--------|--------|--------|--------|--------|---|---|
| 108.100 | 174.300 | 46.000 | 1111.1 | 0.1001 | 0.1001 | 0.1001 | 0.1001 | 1 | G |
| 120.200 | 176.400 | 56.500 | 32.900 | 0.1001 | 0.1001 | 0.1001 | 0.1001 | 1 | K |
| 121.300 | 176.100 | 56.000 | 31.200 | 0.1001 | 0.1001 | 0.1001 | 0.1001 | 1 | R |
| 116.900 | 173.900 | 57.800 | 64.300 | 0.1001 | 0.1001 | 0.1001 | 0.1001 | 1 | S |
| 124.300 | 1111.1  | 60.400 | 32.500 | 0.1001 | 0.1001 | 0.1001 | 0.1001 | 1 | V |
| 119.500 | 175.500 | 58.200 | 64.200 | 0.1001 | 0.1001 | 0.1001 | 0.1001 | 1 | S |
| 123.000 | 179.300 | 59.700 | 29.200 | 0.1001 | 0.1001 | 0.1001 | 0.1001 | 1 | E |
| 118.900 | 179.400 | 59.600 | 32.700 | 0.1001 | 0.1001 | 0.1001 | 0.1001 | 1 | K |
| 122.800 | 178.200 | 58.300 | 40.500 | 0.1001 | 0.1001 | 0.1001 | 0.1001 | 1 | L |
| 117.800 | 176.800 | 67.500 | 68.400 | 0.1001 | 0.1001 | 0.1001 | 0.1001 | 1 | T |
| 118.300 | 176.400 | 66.900 | 68.400 | 0.1001 | 0.1001 | 0.1001 | 0.1001 | 1 | T |
| 124.900 | 180.000 | 55.800 | 18.800 | 0.1001 | 0.1001 | 0.1001 | 0.1001 | 1 | A |
| 118.300 | 178.300 | 59.600 | 32.500 | 0.1001 | 0.1001 | 0.1001 | 0.1001 | 1 | M |
| 119.500 | 179.000 | 56.300 | 37.700 | 0.1001 | 0.1001 | 0.1001 | 0.1001 | 1 | N |
| 122.500 | 179.300 | 59.700 | 30.700 | 0.1001 | 0.1001 | 0.1001 | 0.1001 | 1 | R |
| 123.100 | 176.400 | 60.600 | 39.400 | 0.1001 | 0.1001 | 0.1001 | 0.1001 | 1 | F |
| 119.800 | 177.600 | 60.700 | 32.500 | 0.1001 | 0.1001 | 0.1001 | 0.1001 | 1 | K |
| 119.000 | 180.400 | 55.000 | 18.000 | 0.1001 | 0.1001 | 0.1001 | 0.1001 | 1 | A |
| 122.200 | 179.800 | 55.200 | 17.800 | 0.1001 | 0.1001 | 0.1001 | 0.1001 | 1 | A |
| 118.900 | 179.200 | 57.500 | 41.400 | 0.1001 | 0.1001 | 0.1001 | 0.1001 | 1 | L |
| 120.500 | 180.500 | 59.900 | 29.200 | 0.1001 | 0.1001 | 0.1001 | 0.1001 | 1 | E |
| 122.200 | 179.600 | 59.400 | 29.400 | 0.1001 | 0.1001 | 0.1001 | 0.1001 | 1 | E |
| 122.800 | 178.500 | 55.700 | 17.200 | 0.1001 | 0.1001 | 0.1001 | 0.1001 | 1 | A |
| 115.700 | 177.600 | 56.300 | 38.900 | 0.1001 | 0.1001 | 0.1001 | 0.1001 | 1 | N |
| 105.500 | 177.100 | 47.000 | 1111.1 | 0.1001 | 0.1001 | 0.1001 | 0.1001 | 1 | G |
| 123.500 | 178.500 | 58.700 | 29.900 | 0.1001 | 0.1001 | 0.1001 | 0.1001 | 1 | E |
| 120.300 | 178.300 | 65.500 | 37.900 | 0.1001 | 0.1001 | 0.1001 | 0.1001 | 1 | I |
| 119.400 | 180.200 | 59.700 | 29.300 | 0.1001 | 0.1001 | 0.1001 | 0.1001 | 1 | E |
| 121.600 | 179.200 | 59.900 | 32.300 | 0.1001 | 0.1001 | 0.1001 | 0.1001 | 1 | K |
| 115.900 | 174.100 | 58.200 | 36.900 | 0.1001 | 0.1001 | 0.1001 | 0.1001 | 1 | F |
| 113.300 | 173.700 | 60.500 | 63.400 | 0.1001 | 0.1001 | 0.1001 | 0.1001 | 1 | S |
| 119.500 | 1111.1  | 52.100 | 40.300 | 0.1001 | 0.1001 | 0.1001 | 0.1001 | 1 | N |
| 127.400 | 177.700 | 59.800 | 30.100 | 0.1001 | 0.1001 | 0.1001 | 0.1001 | 1 | R |
| 114.600 | 177.100 | 62.200 | 62.000 | 0.1001 | 0.1001 | 0.1001 | 0.1001 | 1 | S |
| 119.700 | 179.100 | 55.400 | 37.600 | 0.1001 | 0.1001 | 0.1001 | 0.1001 | 1 | N |
| 122.100 | 176.900 | 64.700 | 37.400 | 0.1001 | 0.1001 | 0.1001 | 0.1001 | 1 | I |
| 119.200 | 177.400 | 63.800 | 26.900 | 0.1001 | 0.1001 | 0.1001 | 0.1001 | 1 | C |
| 119.200 | 178.500 | 59.500 | 30.300 | 0.1001 | 0.1001 | 0.1001 | 0.1001 | 1 | R |
| 120.300 | 177.200 | 61.500 | 39.800 | 0.1001 | 0.1001 | 0.1001 | 0.1001 | 1 | F |
| 117.900 | 178.700 | 57.400 | 41.600 | 0.1001 | 0.1001 | 0.1001 | 0.1001 | 1 | L |
| 112.000 | 174.900 | 65.200 | 69.300 | 0.1001 | 0.1001 | 0.1001 | 0.1001 | 1 | T |
| 122.400 | 177.500 | 53.000 | 20.000 | 0.1001 | 0.1001 | 0.1001 | 0.1001 | 1 | A |
| 112.900 | 1111.1  | 57.600 | 64.000 | 0.1001 | 0.1001 | 0.1001 | 0.1001 | 1 | S |
| 125.700 | 176.700 | 57.700 | 29.000 | 0.1001 | 0.1001 | 0.1001 | 0.1001 | 1 | Q |
| 116.400 | 1111.1  | 54.000 | 41.700 | 0.1001 | 0.1001 | 0.1001 | 0.1001 | 1 | D |
| 131.100 | 177.200 | 58.000 | 42.900 | 0.1001 | 0.1001 | 0.1001 | 0.1001 | 1 | L |
| 113.600 | 175.400 | 55.700 | 37.600 | 0.1001 | 0.1001 | 0.1001 | 0.1001 | 1 | F |
| 119.500 | 178.900 | 61.100 | 33.500 | 0.1001 | 0.1001 | 0.1001 | 0.1001 | 1 | K |
| 117.800 | 179.000 | 57.800 | 40.400 | 0.1001 | 0.1001 | 0.1001 | 0.1001 | 1 | D |
| 122.600 | 177.100 | 65.700 | 32.300 | 0.1001 | 0.1001 | 0.1001 | 0.1001 | 1 | V |
| 121.000 | 178.500 | 56.200 | 37.900 | 0.1001 | 0.1001 | 0.1001 | 0.1001 | 1 | N |

|         |         |        |        |        |        |        |        |   |   |
|---------|---------|--------|--------|--------|--------|--------|--------|---|---|
| 120.700 | 177.900 | 59.100 | 29.900 | 0.1001 | 0.1001 | 0.1001 | 0.1001 | 1 | R |
| 119.700 | 179.300 | 60.100 | 32.500 | 0.1001 | 0.1001 | 0.1001 | 0.1001 | 1 | K |
| 118.200 | 178.400 | 58.500 | 42.500 | 0.1001 | 0.1001 | 0.1001 | 0.1001 | 1 | L |
| 111.700 | 177.500 | 61.400 | 62.600 | 0.1001 | 0.1001 | 0.1001 | 0.1001 | 1 | S |
| 122.000 | 179.700 | 57.900 | 40.600 | 0.1001 | 0.1001 | 0.1001 | 0.1001 | 1 | D |
| 119.200 | 178.400 | 65.600 | 31.500 | 0.1001 | 0.1001 | 0.1001 | 0.1001 | 1 | V |
| 121.900 | 178.000 | 60.100 | 29.700 | 0.1001 | 0.1001 | 0.1001 | 0.1001 | 1 | W |
| 119.500 | 178.000 | 60.500 | 32.200 | 0.1001 | 0.1001 | 0.1001 | 0.1001 | 1 | K |
| 116.700 | 178.400 | 58.800 | 30.400 | 0.1001 | 0.1001 | 0.1001 | 0.1001 | 1 | E |
| 119.000 | 177.600 | 57.800 | 42.200 | 0.1001 | 0.1001 | 0.1001 | 0.1001 | 1 | L |
| 113.100 | 176.300 | 61.600 | 61.800 | 0.1001 | 0.1001 | 0.1001 | 0.1001 | 1 | S |
| 121.500 | 179.100 | 58.000 | 41.800 | 0.1001 | 0.1001 | 0.1001 | 0.1001 | 1 | L |
| 118.200 | 179.600 | 57.700 | 43.100 | 0.1001 | 0.1001 | 0.1001 | 0.1001 | 1 | L |
| 118.700 | 179.300 | 57.600 | 41.400 | 0.1001 | 0.1001 | 0.1001 | 0.1001 | 1 | L |
| 119.500 | 178.200 | 58.800 | 28.800 | 0.1001 | 0.1001 | 0.1001 | 0.1001 | 1 | Q |
| 117.600 | 177.900 | 65.400 | 32.900 | 0.1001 | 0.1001 | 0.1001 | 0.1001 | 1 | V |
| 116.900 | 177.700 | 58.400 | 30.700 | 0.1001 | 0.1001 | 0.1001 | 0.1001 | 1 | E |
| 113.300 | 174.700 | 54.500 | 28.600 | 0.1001 | 0.1001 | 0.1001 | 0.1001 | 1 | Q |
| 114.800 | 175.600 | 56.600 | 27.700 | 0.1001 | 0.1001 | 0.1001 | 0.1001 | 1 | R |
| 120.300 | 1111.1  | 53.700 | 34.700 | 0.1001 | 0.1001 | 0.1001 | 0.1001 | 1 | M |
| 120.000 | 175.800 | 61.700 | 33.100 | 0.1001 | 0.1001 | 0.1001 | 0.1001 | 1 | V |
| 121.200 | 1111.1  | 56.200 | 63.700 | 0.1001 | 0.1001 | 0.1001 | 0.1001 | 1 | S |
| 119.900 | 176.300 | 61.300 | 38.800 | 0.1001 | 0.1001 | 0.1001 | 0.1001 | 1 | I |
| 119.000 | 174.600 | 58.300 | 63.600 | 0.1001 | 0.1001 | 0.1001 | 0.1001 | 1 | S |
| 122.600 | 176.200 | 56.300 | 29.100 | 0.1001 | 0.1001 | 0.1001 | 0.1001 | 1 | Q |
| 109.200 | 175.100 | 45.200 | 1111.1 | 0.1001 | 0.1001 | 0.1001 | 0.1001 | 1 | G |
| 124.700 | 178.700 | 53.800 | 18.900 | 0.1001 | 0.1001 | 0.1001 | 0.1001 | 1 | A |
| 113.200 | 175.700 | 58.500 | 63.800 | 0.1001 | 0.1001 | 0.1001 | 0.1001 | 1 | S |
| 122.800 | 178.200 | 58.900 | 29.200 | 0.1001 | 0.1001 | 0.1001 | 0.1001 | 1 | W |
| 120.600 | 180.700 | 55.700 | 18.000 | 0.1001 | 0.1001 | 0.1001 | 0.1001 | 1 | A |
| 118.900 | 179.200 | 59.000 | 28.500 | 0.1001 | 0.1001 | 0.1001 | 0.1001 | 1 | Q |
| 120.900 | 177.800 | 59.000 | 30.000 | 0.1001 | 0.1001 | 0.1001 | 0.1001 | 1 | E |
| 118.200 | 178.100 | 57.200 | 40.100 | 0.1001 | 0.1001 | 0.1001 | 0.1001 | 1 | D |
| 116.900 | 178.400 | 58.900 | 28.700 | 0.1001 | 0.1001 | 0.1001 | 0.1001 | 1 | Q |
| 119.500 | 178.900 | 58.900 | 28.600 | 0.1001 | 0.1001 | 0.1001 | 0.1001 | 1 | Q |
| 121.700 | 177.700 | 57.300 | 40.700 | 0.1001 | 0.1001 | 0.1001 | 0.1001 | 1 | D |
| 121.000 | 180.800 | 55.400 | 19.500 | 0.1001 | 0.1001 | 0.1001 | 0.1001 | 1 | A |
| 119.100 | 178.600 | 57.600 | 41.300 | 0.1001 | 0.1001 | 0.1001 | 0.1001 | 1 | D |
| 119.500 | 180.100 | 59.700 | 29.600 | 0.1001 | 0.1001 | 0.1001 | 0.1001 | 1 | E |
| 121.000 | 179.500 | 57.500 | 41.100 | 0.1001 | 0.1001 | 0.1001 | 0.1001 | 1 | D |
| 121.400 | 178.700 | 59.500 | 29.600 | 0.1001 | 0.1001 | 0.1001 | 0.1001 | 1 | R |
| 119.400 | 178.400 | 59.400 | 30.200 | 0.1001 | 0.1001 | 0.1001 | 0.1001 | 1 | R |
| 120.300 | 179.500 | 54.100 | 19.100 | 0.1001 | 0.1001 | 0.1001 | 0.1001 | 1 | A |
| 119.900 | 176.900 | 60.500 | 39.700 | 0.1001 | 0.1001 | 0.1001 | 0.1001 | 1 | F |
| 118.500 | 176.400 | 56.900 | 28.900 | 0.1001 | 0.1001 | 0.1001 | 0.1001 | 1 | Q |
| 118.000 | 176.300 | 56.000 | 32.800 | 0.1001 | 0.1001 | 0.1001 | 0.1001 | 1 | M |
| 121.200 | 177.100 | 55.400 | 42.300 | 0.1001 | 0.1001 | 0.1001 | 0.1001 | 1 | L |
| 121.800 | 176.000 | 56.200 | 30.900 | 0.1001 | 0.1001 | 0.1001 | 0.1001 | 1 | R |
| 123.100 | 174.900 | 56.000 | 31.000 | 0.1001 | 0.1001 | 0.1001 | 0.1001 | 1 | R |
| 126.900 | 1111.11 | 55.800 | 42.300 | 0.1001 | 0.1001 | 0.1001 | 0.1001 | 1 | D |

Supporting Table S8: NCOCX signal table for SrtC, with 0.1001 ppm chemical shift uncertainties and unambiguous residue-type assignments. (A shift value of 1111.1 indicates absent data.)

| N(i+1)  | CO(i)   | CA(i)  | CB(i)  | dN     | dCO    | dCA    | dCB    | restype |
|---------|---------|--------|--------|--------|--------|--------|--------|---------|
| 120.000 | 179.300 | 57.900 | 40.800 | 0.1001 | 0.1001 | 0.1001 | 0.1001 | 1 L     |
| 117.300 | 178.400 | 59.400 | 29.200 | 0.1001 | 0.1001 | 0.1001 | 0.1001 | 1 E     |
| 119.700 | 177.900 | 55.800 | 39.000 | 0.1001 | 0.1001 | 0.1001 | 0.1001 | 1 N     |
| 118.200 | 177.900 | 58.400 | 42.000 | 0.1001 | 0.1001 | 0.1001 | 0.1001 | 1 L     |
| 118.400 | 179.200 | 60.000 | 31.900 | 0.1001 | 0.1001 | 0.1001 | 0.1001 | 1 K     |
| 120.300 | 178.200 | 59.100 | 30.900 | 0.1001 | 0.1001 | 0.1001 | 0.1001 | 1 H     |
| 120.200 | 176.500 | 66.000 | 38.700 | 0.1001 | 0.1001 | 0.1001 | 0.1001 | 1 I     |
| 115.400 | 178.000 | 65.800 | 38.600 | 0.1001 | 0.1001 | 0.1001 | 0.1001 | 1 I     |
| 122.100 | 176.300 | 66.900 | 68.800 | 0.1001 | 0.1001 | 0.1001 | 0.1001 | 1 T     |
| 105.800 | 178.800 | 57.900 | 42.300 | 0.1001 | 0.1001 | 0.1001 | 0.1001 | 1 L     |
| 119.600 | 174.700 | 47.500 | 1111.1 | 0.1001 | 0.1001 | 0.1001 | 0.1001 | 1 G     |
| 122.600 | 179.600 | 59.300 | 27.900 | 0.1001 | 0.1001 | 0.1001 | 0.1001 | 1 Q     |
| 121.000 | 178.500 | 66.700 | 31.900 | 0.1001 | 0.1001 | 0.1001 | 0.1001 | 1 V     |
| 118.900 | 177.700 | 65.800 | 38.400 | 0.1001 | 0.1001 | 0.1001 | 0.1001 | 1 I     |
| 118.500 | 176.200 | 61.300 | 30.000 | 0.1001 | 0.1001 | 0.1001 | 0.1001 | 1 H     |
| 117.600 | 179.200 | 59.500 | 32.500 | 0.1001 | 0.1001 | 0.1001 | 0.1001 | 1 K     |
| 118.100 | 180.600 | 59.200 | 30.500 | 0.1001 | 0.1001 | 0.1001 | 0.1001 | 1 R     |
| 117.900 | 177.300 | 65.900 | 27.600 | 0.1001 | 0.1001 | 0.1001 | 0.1001 | 1 C     |
| 115.400 | 177.100 | 58.300 | 30.000 | 0.1001 | 0.1001 | 0.1001 | 0.1001 | 1 E     |
| 120.500 | 177.100 | 55.900 | 30.600 | 0.1001 | 0.1001 | 0.1001 | 0.1001 | 1 E     |
| 120.500 | 177.800 | 56.400 | 33.300 | 0.1001 | 0.1001 | 0.1001 | 0.1001 | 1 M     |
| 115.500 | 175.400 | 57.000 | 33.600 | 0.1001 | 0.1001 | 0.1001 | 0.1001 | 1 K     |
| 113.600 | 173.700 | 55.000 | 41.900 | 0.1001 | 0.1001 | 0.1001 | 0.1001 | 1 Y     |
| 115.800 | 174.700 | 60.400 | 26.100 | 0.1001 | 0.1001 | 0.1001 | 0.1001 | 1 C     |
| 121.000 | 179.800 | 60.700 | 33.300 | 0.1001 | 0.1001 | 0.1001 | 0.1001 | 1 K     |
| 120.500 | 181.300 | 59.000 | 30.400 | 0.1001 | 0.1001 | 0.1001 | 0.1001 | 1 K     |
| 118.800 | 180.200 | 59.300 | 32.100 | 0.1001 | 0.1001 | 0.1001 | 0.1001 | 1 Q     |
| 119.300 | 176.200 | 64.300 | 26.800 | 0.1001 | 0.1001 | 0.1001 | 0.1001 | 1 C     |
| 119.700 | 178.900 | 59.300 | 29.200 | 0.1001 | 0.1001 | 0.1001 | 0.1001 | 1 R     |
| 120.600 | 178.000 | 58.200 | 29.100 | 0.1001 | 0.1001 | 0.1001 | 0.1001 | 1 R     |
| 105.200 | 178.400 | 58.300 | 40.200 | 0.1001 | 0.1001 | 0.1001 | 0.1001 | 1 L     |
| 120.500 | 175.600 | 48.400 | 1111.1 | 0.1001 | 0.1001 | 0.1001 | 0.1001 | 1 G     |
| 121.900 | 179.400 | 59.600 | 30.600 | 0.1001 | 0.1001 | 0.1001 | 0.1001 | 1 H     |
| 118.500 | 179.600 | 59.500 | 30.100 | 0.1001 | 0.1001 | 0.1001 | 0.1001 | 1 R     |
| 118.300 | 177.600 | 67.800 | 31.300 | 0.1001 | 0.1001 | 0.1001 | 0.1001 | 1 V     |
| 104.900 | 179.600 | 58.000 | 41.400 | 0.1001 | 0.1001 | 0.1001 | 0.1001 | 1 L     |
| 120.500 | 175.700 | 46.700 | 1111.1 | 0.1001 | 0.1001 | 0.1001 | 0.1001 | 1 G     |
| 108.700 | 176.900 | 56.500 | 41.600 | 0.1001 | 0.1001 | 0.1001 | 0.1001 | 1 L     |
| 122.800 | 178.100 | 62.700 | 38.500 | 0.1001 | 0.1001 | 0.1001 | 0.1001 | 1 I     |
| 114.400 | 178.700 | 65.500 | 31.600 | 0.1001 | 0.1001 | 0.1001 | 0.1001 | 1 P     |
| 119.200 | 178.800 | 57.100 | 40.300 | 0.1001 | 0.1001 | 0.1001 | 0.1001 | 1 L     |
| 116.500 | 179.100 | 59.500 | 30.100 | 0.1001 | 0.1001 | 0.1001 | 0.1001 | 1 E     |
| 119.900 | 177.900 | 57.600 | 32.500 | 0.1001 | 0.1001 | 0.1001 | 0.1001 | 1 M     |
| 118.300 | 178.000 | 56.600 | 42.000 | 0.1001 | 0.1001 | 0.1001 | 0.1001 | 1 L     |
| 119.000 | 176.500 | 57.700 | 29.500 | 0.1001 | 0.1001 | 0.1001 | 0.1001 | 1 Q     |
| 119.500 | 176.900 | 55.300 | 41.300 | 0.1001 | 0.1001 | 0.1001 | 0.1001 | 1 D     |
| 108.100 | 177.200 | 56.700 | 29.300 | 0.1001 | 0.1001 | 0.1001 | 0.1001 | 1 Q     |

|         |         |        |        |        |        |        |        |   |   |
|---------|---------|--------|--------|--------|--------|--------|--------|---|---|
| 120.200 | 174.300 | 46.000 | 1111.1 | 0.1001 | 0.1001 | 0.1001 | 0.1001 | 1 | G |
| 121.300 | 176.400 | 56.500 | 32.900 | 0.1001 | 0.1001 | 0.1001 | 0.1001 | 1 | K |
| 116.900 | 176.100 | 56.000 | 31.200 | 0.1001 | 0.1001 | 0.1001 | 0.1001 | 1 | R |
| 124.300 | 173.900 | 57.800 | 64.300 | 0.1001 | 0.1001 | 0.1001 | 0.1001 | 1 | S |
| 119.500 | 176.600 | 62.500 | 32.600 | 0.1001 | 0.1001 | 0.1001 | 0.1001 | 1 | P |
| 123.000 | 175.500 | 58.200 | 64.200 | 0.1001 | 0.1001 | 0.1001 | 0.1001 | 1 | S |
| 118.900 | 179.300 | 59.700 | 29.200 | 0.1001 | 0.1001 | 0.1001 | 0.1001 | 1 | E |
| 122.800 | 179.400 | 59.600 | 32.700 | 0.1001 | 0.1001 | 0.1001 | 0.1001 | 1 | K |
| 117.800 | 178.200 | 58.300 | 40.500 | 0.1001 | 0.1001 | 0.1001 | 0.1001 | 1 | L |
| 118.300 | 176.800 | 67.500 | 68.400 | 0.1001 | 0.1001 | 0.1001 | 0.1001 | 1 | T |
| 124.900 | 176.400 | 66.900 | 68.400 | 0.1001 | 0.1001 | 0.1001 | 0.1001 | 1 | T |
| 118.300 | 180.000 | 55.800 | 18.800 | 0.1001 | 0.1001 | 0.1001 | 0.1001 | 1 | A |
| 119.500 | 178.300 | 59.600 | 32.500 | 0.1001 | 0.1001 | 0.1001 | 0.1001 | 1 | M |
| 122.500 | 179.000 | 56.300 | 37.700 | 0.1001 | 0.1001 | 0.1001 | 0.1001 | 1 | N |
| 123.100 | 179.300 | 59.700 | 30.700 | 0.1001 | 0.1001 | 0.1001 | 0.1001 | 1 | R |
| 119.800 | 176.400 | 60.600 | 39.400 | 0.1001 | 0.1001 | 0.1001 | 0.1001 | 1 | F |
| 119.000 | 177.600 | 60.700 | 32.500 | 0.1001 | 0.1001 | 0.1001 | 0.1001 | 1 | K |
| 122.200 | 180.400 | 55.000 | 18.000 | 0.1001 | 0.1001 | 0.1001 | 0.1001 | 1 | A |
| 118.900 | 179.800 | 55.200 | 17.800 | 0.1001 | 0.1001 | 0.1001 | 0.1001 | 1 | A |
| 120.500 | 179.200 | 57.500 | 41.400 | 0.1001 | 0.1001 | 0.1001 | 0.1001 | 1 | L |
| 122.200 | 180.500 | 59.900 | 29.200 | 0.1001 | 0.1001 | 0.1001 | 0.1001 | 1 | E |
| 122.800 | 179.600 | 59.400 | 29.400 | 0.1001 | 0.1001 | 0.1001 | 0.1001 | 1 | E |
| 115.700 | 178.500 | 55.700 | 17.200 | 0.1001 | 0.1001 | 0.1001 | 0.1001 | 1 | A |
| 105.500 | 177.600 | 56.300 | 38.900 | 0.1001 | 0.1001 | 0.1001 | 0.1001 | 1 | N |
| 123.500 | 177.100 | 47.000 | 1111.1 | 0.1001 | 0.1001 | 0.1001 | 0.1001 | 1 | G |
| 120.300 | 178.500 | 58.700 | 29.900 | 0.1001 | 0.1001 | 0.1001 | 0.1001 | 1 | E |
| 119.400 | 178.300 | 65.500 | 37.900 | 0.1001 | 0.1001 | 0.1001 | 0.1001 | 1 | I |
| 121.600 | 180.200 | 59.700 | 29.300 | 0.1001 | 0.1001 | 0.1001 | 0.1001 | 1 | E |
| 115.900 | 179.200 | 59.900 | 32.300 | 0.1001 | 0.1001 | 0.1001 | 0.1001 | 1 | K |
| 113.300 | 174.100 | 58.200 | 36.900 | 0.1001 | 0.1001 | 0.1001 | 0.1001 | 1 | F |
| 119.500 | 173.700 | 60.500 | 63.400 | 0.1001 | 0.1001 | 0.1001 | 0.1001 | 1 | S |
| 127.400 | 1111.1  | 52.100 | 40.300 | 0.1001 | 0.1001 | 0.1001 | 0.1001 | 1 | N |
| 114.600 | 177.700 | 59.800 | 30.100 | 0.1001 | 0.1001 | 0.1001 | 0.1001 | 1 | R |
| 119.700 | 177.100 | 62.200 | 62.000 | 0.1001 | 0.1001 | 0.1001 | 0.1001 | 1 | S |
| 122.100 | 179.100 | 55.400 | 37.600 | 0.1001 | 0.1001 | 0.1001 | 0.1001 | 1 | N |
| 119.200 | 176.900 | 64.700 | 37.400 | 0.1001 | 0.1001 | 0.1001 | 0.1001 | 1 | I |
| 119.200 | 177.400 | 63.800 | 26.900 | 0.1001 | 0.1001 | 0.1001 | 0.1001 | 1 | C |
| 120.300 | 178.500 | 59.500 | 30.300 | 0.1001 | 0.1001 | 0.1001 | 0.1001 | 1 | R |
| 117.900 | 177.200 | 61.500 | 39.800 | 0.1001 | 0.1001 | 0.1001 | 0.1001 | 1 | F |
| 112.000 | 178.700 | 57.400 | 41.600 | 0.1001 | 0.1001 | 0.1001 | 0.1001 | 1 | L |
| 122.400 | 174.900 | 65.200 | 69.300 | 0.1001 | 0.1001 | 0.1001 | 0.1001 | 1 | T |
| 112.900 | 177.500 | 53.000 | 20.000 | 0.1001 | 0.1001 | 0.1001 | 0.1001 | 1 | A |
| 125.700 | 1111.1  | 57.600 | 64.000 | 0.1001 | 0.1001 | 0.1001 | 0.1001 | 1 | S |
| 116.400 | 176.700 | 57.700 | 29.000 | 0.1001 | 0.1001 | 0.1001 | 0.1001 | 1 | Q |
| 114.300 | 1111.1  | 54.000 | 41.700 | 0.1001 | 0.1001 | 0.1001 | 0.1001 | 1 | D |
| 131.100 | 177.000 | 60.800 | 38.100 | 0.1001 | 0.1001 | 0.1001 | 0.1001 | 1 | I |
| 113.600 | 177.200 | 58.000 | 42.900 | 0.1001 | 0.1001 | 0.1001 | 0.1001 | 1 | L |
| 119.500 | 175.400 | 55.700 | 37.600 | 0.1001 | 0.1001 | 0.1001 | 0.1001 | 1 | F |
| 117.800 | 178.900 | 61.100 | 33.500 | 0.1001 | 0.1001 | 0.1001 | 0.1001 | 1 | K |
| 122.600 | 179.000 | 57.800 | 40.400 | 0.1001 | 0.1001 | 0.1001 | 0.1001 | 1 | D |
| 121.000 | 177.100 | 65.700 | 32.300 | 0.1001 | 0.1001 | 0.1001 | 0.1001 | 1 | V |



|         |         |        |        |        |        |        |        |   |   |
|---------|---------|--------|--------|--------|--------|--------|--------|---|---|
| 120.700 | 178.500 | 56.200 | 37.900 | 0.1001 | 0.1001 | 0.1001 | 0.1001 | 1 | N |
| 119.700 | 177.900 | 59.100 | 29.900 | 0.1001 | 0.1001 | 0.1001 | 0.1001 | 1 | R |
| 118.200 | 179.300 | 60.100 | 32.500 | 0.1001 | 0.1001 | 0.1001 | 0.1001 | 1 | K |
| 111.700 | 178.400 | 58.500 | 42.500 | 0.1001 | 0.1001 | 0.1001 | 0.1001 | 1 | L |
| 122.000 | 177.500 | 61.400 | 62.600 | 0.1001 | 0.1001 | 0.1001 | 0.1001 | 1 | S |
| 119.200 | 179.700 | 57.900 | 40.600 | 0.1001 | 0.1001 | 0.1001 | 0.1001 | 1 | D |
| 121.900 | 178.400 | 65.600 | 31.500 | 0.1001 | 0.1001 | 0.1001 | 0.1001 | 1 | V |
| 119.500 | 178.000 | 60.100 | 29.700 | 0.1001 | 0.1001 | 0.1001 | 0.1001 | 1 | W |
| 116.700 | 178.000 | 60.500 | 32.200 | 0.1001 | 0.1001 | 0.1001 | 0.1001 | 1 | K |
| 119.000 | 178.400 | 58.800 | 30.400 | 0.1001 | 0.1001 | 0.1001 | 0.1001 | 1 | E |
| 113.100 | 177.600 | 57.800 | 42.200 | 0.1001 | 0.1001 | 0.1001 | 0.1001 | 1 | L |
| 121.500 | 176.300 | 61.600 | 61.800 | 0.1001 | 0.1001 | 0.1001 | 0.1001 | 1 | S |
| 118.200 | 179.100 | 58.000 | 41.800 | 0.1001 | 0.1001 | 0.1001 | 0.1001 | 1 | L |
| 118.700 | 179.600 | 57.700 | 43.100 | 0.1001 | 0.1001 | 0.1001 | 0.1001 | 1 | L |
| 119.500 | 179.300 | 57.600 | 41.400 | 0.1001 | 0.1001 | 0.1001 | 0.1001 | 1 | L |
| 117.600 | 178.200 | 58.800 | 28.800 | 0.1001 | 0.1001 | 0.1001 | 0.1001 | 1 | Q |
| 116.900 | 177.900 | 65.400 | 32.900 | 0.1001 | 0.1001 | 0.1001 | 0.1001 | 1 | V |
| 113.300 | 177.700 | 58.400 | 30.700 | 0.1001 | 0.1001 | 0.1001 | 0.1001 | 1 | E |
| 114.800 | 174.700 | 54.500 | 28.600 | 0.1001 | 0.1001 | 0.1001 | 0.1001 | 1 | Q |
| 120.300 | 175.600 | 56.600 | 27.700 | 0.1001 | 0.1001 | 0.1001 | 0.1001 | 1 | R |
| 120.000 | 176.300 | 62.800 | 31.300 | 0.1001 | 0.1001 | 0.1001 | 0.1001 | 1 | P |
| 121.200 | 175.800 | 61.700 | 33.100 | 0.1001 | 0.1001 | 0.1001 | 0.1001 | 1 | V |
| 119.900 | 177.100 | 63.400 | 31.900 | 0.1001 | 0.1001 | 0.1001 | 0.1001 | 1 | P |
| 119.000 | 176.300 | 61.300 | 38.800 | 0.1001 | 0.1001 | 0.1001 | 0.1001 | 1 | I |
| 122.600 | 174.600 | 58.300 | 63.600 | 0.1001 | 0.1001 | 0.1001 | 0.1001 | 1 | S |
| 109.200 | 176.200 | 56.300 | 29.100 | 0.1001 | 0.1001 | 0.1001 | 0.1001 | 1 | Q |
| 124.700 | 175.100 | 45.200 | 1111.1 | 0.1001 | 0.1001 | 0.1001 | 0.1001 | 1 | G |
| 113.200 | 178.700 | 53.800 | 18.900 | 0.1001 | 0.1001 | 0.1001 | 0.1001 | 1 | A |
| 122.800 | 175.700 | 58.500 | 63.800 | 0.1001 | 0.1001 | 0.1001 | 0.1001 | 1 | S |
| 120.600 | 178.200 | 58.900 | 29.200 | 0.1001 | 0.1001 | 0.1001 | 0.1001 | 1 | W |
| 118.900 | 180.700 | 55.700 | 18.000 | 0.1001 | 0.1001 | 0.1001 | 0.1001 | 1 | A |
| 120.900 | 179.200 | 59.000 | 28.500 | 0.1001 | 0.1001 | 0.1001 | 0.1001 | 1 | Q |
| 118.200 | 177.800 | 59.000 | 30.000 | 0.1001 | 0.1001 | 0.1001 | 0.1001 | 1 | E |
| 116.900 | 178.100 | 57.200 | 40.100 | 0.1001 | 0.1001 | 0.1001 | 0.1001 | 1 | D |
| 119.500 | 178.400 | 58.900 | 28.700 | 0.1001 | 0.1001 | 0.1001 | 0.1001 | 1 | Q |
| 121.700 | 178.900 | 58.900 | 28.600 | 0.1001 | 0.1001 | 0.1001 | 0.1001 | 1 | Q |
| 121.000 | 177.700 | 57.300 | 40.700 | 0.1001 | 0.1001 | 0.1001 | 0.1001 | 1 | D |
| 119.100 | 180.800 | 55.400 | 19.500 | 0.1001 | 0.1001 | 0.1001 | 0.1001 | 1 | A |
| 119.500 | 178.600 | 57.600 | 41.300 | 0.1001 | 0.1001 | 0.1001 | 0.1001 | 1 | D |
| 121.000 | 180.100 | 59.700 | 29.600 | 0.1001 | 0.1001 | 0.1001 | 0.1001 | 1 | E |
| 121.400 | 179.500 | 57.500 | 41.100 | 0.1001 | 0.1001 | 0.1001 | 0.1001 | 1 | D |
| 119.400 | 178.700 | 59.500 | 29.600 | 0.1001 | 0.1001 | 0.1001 | 0.1001 | 1 | R |
| 120.300 | 178.400 | 59.400 | 30.200 | 0.1001 | 0.1001 | 0.1001 | 0.1001 | 1 | R |
| 119.900 | 179.500 | 54.100 | 19.100 | 0.1001 | 0.1001 | 0.1001 | 0.1001 | 1 | A |
| 118.500 | 176.900 | 60.500 | 39.700 | 0.1001 | 0.1001 | 0.1001 | 0.1001 | 1 | F |
| 118.000 | 176.400 | 56.900 | 28.900 | 0.1001 | 0.1001 | 0.1001 | 0.1001 | 1 | Q |
| 121.200 | 176.300 | 56.000 | 32.800 | 0.1001 | 0.1001 | 0.1001 | 0.1001 | 1 | M |
| 121.800 | 177.100 | 55.400 | 42.300 | 0.1001 | 0.1001 | 0.1001 | 0.1001 | 1 | L |
| 123.100 | 176.000 | 56.200 | 30.900 | 0.1001 | 0.1001 | 0.1001 | 0.1001 | 1 | R |
| 126.900 | 174.900 | 56.000 | 31.000 | 0.1001 | 0.1001 | 0.1001 | 0.1001 | 1 | R |

Supporting Table S9: CONCA signal table for SrtC, with 0.1001 ppm chemical shift uncertainties and unambiguous residue-type assignments.

| N(i)    | CO(i-1) | CA(i)  | dN  | dCO    | dCA    | restype    |
|---------|---------|--------|-----|--------|--------|------------|
| 120.000 | 179.300 | 59.400 | 0.0 | 0.1001 | 0.1001 | 0.1001 1 E |
| 117.300 | 178.400 | 55.800 | 0.0 | 0.1001 | 0.1001 | 0.1001 1 N |
| 119.700 | 177.900 | 58.400 | 0.0 | 0.1001 | 0.1001 | 0.1001 1 L |
| 118.200 | 177.900 | 60.000 | 0.0 | 0.1001 | 0.1001 | 0.1001 1 K |
| 118.400 | 179.200 | 59.100 | 0.0 | 0.1001 | 0.1001 | 0.1001 1 H |
| 120.300 | 178.200 | 66.000 | 0.0 | 0.1001 | 0.1001 | 0.1001 1 I |
| 120.200 | 176.500 | 65.800 | 0.0 | 0.1001 | 0.1001 | 0.1001 1 I |
| 115.400 | 178.000 | 66.900 | 0.0 | 0.1001 | 0.1001 | 0.1001 1 T |
| 122.100 | 176.300 | 57.900 | 0.0 | 0.1001 | 0.1001 | 0.1001 1 L |
| 105.800 | 178.800 | 47.500 | 0.0 | 0.1001 | 0.1001 | 0.1001 1 G |
| 119.600 | 174.700 | 59.300 | 0.0 | 0.1001 | 0.1001 | 0.1001 1 Q |
| 122.600 | 179.600 | 66.700 | 0.0 | 0.1001 | 0.1001 | 0.1001 1 V |
| 121.000 | 178.500 | 65.800 | 0.0 | 0.1001 | 0.1001 | 0.1001 1 I |
| 118.900 | 177.700 | 61.300 | 0.0 | 0.1001 | 0.1001 | 0.1001 1 H |
| 118.500 | 176.200 | 59.500 | 0.0 | 0.1001 | 0.1001 | 0.1001 1 K |
| 117.600 | 179.200 | 59.200 | 0.0 | 0.1001 | 0.1001 | 0.1001 1 R |
| 118.100 | 180.600 | 65.900 | 0.0 | 0.1001 | 0.1001 | 0.1001 1 C |
| 117.900 | 177.300 | 58.300 | 0.0 | 0.1001 | 0.1001 | 0.1001 1 E |
| 115.400 | 177.100 | 55.900 | 0.0 | 0.1001 | 0.1001 | 0.1001 1 E |
| 120.500 | 177.100 | 56.400 | 0.0 | 0.1001 | 0.1001 | 0.1001 1 M |
| 120.500 | 177.800 | 57.000 | 0.0 | 0.1001 | 0.1001 | 0.1001 1 K |
| 115.500 | 175.400 | 55.000 | 0.0 | 0.1001 | 0.1001 | 0.1001 1 Y |
| 113.600 | 173.700 | 60.400 | 0.0 | 0.1001 | 0.1001 | 0.1001 1 C |
| 115.800 | 174.700 | 60.700 | 0.0 | 0.1001 | 0.1001 | 0.1001 1 K |
| 121.000 | 179.800 | 59.000 | 0.0 | 0.1001 | 0.1001 | 0.1001 1 K |
| 120.500 | 181.300 | 59.300 | 0.0 | 0.1001 | 0.1001 | 0.1001 1 Q |
| 118.800 | 180.200 | 64.300 | 0.0 | 0.1001 | 0.1001 | 0.1001 1 C |
| 119.300 | 176.200 | 59.300 | 0.0 | 0.1001 | 0.1001 | 0.1001 1 R |
| 119.700 | 178.900 | 58.200 | 0.0 | 0.1001 | 0.1001 | 0.1001 1 R |
| 120.600 | 178.000 | 58.300 | 0.0 | 0.1001 | 0.1001 | 0.1001 1 L |
| 105.200 | 178.400 | 48.400 | 0.0 | 0.1001 | 0.1001 | 0.1001 1 G |
| 120.500 | 175.600 | 59.600 | 0.0 | 0.1001 | 0.1001 | 0.1001 1 H |
| 121.900 | 179.400 | 59.500 | 0.0 | 0.1001 | 0.1001 | 0.1001 1 R |
| 118.500 | 179.600 | 67.800 | 0.0 | 0.1001 | 0.1001 | 0.1001 1 V |
| 118.300 | 177.600 | 58.000 | 0.0 | 0.1001 | 0.1001 | 0.1001 1 L |
| 104.900 | 179.600 | 46.700 | 0.0 | 0.1001 | 0.1001 | 0.1001 1 G |
| 120.500 | 175.700 | 56.500 | 0.0 | 0.1001 | 0.1001 | 0.1001 1 L |
| 108.700 | 176.900 | 62.700 | 0.0 | 0.1001 | 0.1001 | 0.1001 1 I |
| 122.800 | 178.100 | 60.700 | 0.0 | 0.1001 | 0.1001 | 0.1001 1 K |
| 114.400 | 178.700 | 57.100 | 0.0 | 0.1001 | 0.1001 | 0.1001 1 L |
| 119.200 | 178.800 | 59.500 | 0.0 | 0.1001 | 0.1001 | 0.1001 1 E |
| 116.500 | 179.100 | 57.600 | 0.0 | 0.1001 | 0.1001 | 0.1001 1 M |
| 119.900 | 177.900 | 56.600 | 0.0 | 0.1001 | 0.1001 | 0.1001 1 L |
| 118.300 | 178.000 | 57.700 | 0.0 | 0.1001 | 0.1001 | 0.1001 1 Q |
| 119.000 | 176.500 | 55.300 | 0.0 | 0.1001 | 0.1001 | 0.1001 1 D |
| 119.500 | 176.900 | 56.700 | 0.0 | 0.1001 | 0.1001 | 0.1001 1 Q |
| 108.100 | 177.200 | 46.000 | 0.0 | 0.1001 | 0.1001 | 0.1001 1 G |

|         |         |        |     |        |        |        |        |   |   |
|---------|---------|--------|-----|--------|--------|--------|--------|---|---|
| 120.200 | 174.300 | 56.500 | 0.0 | 0.1001 | 0.1001 | 0.1001 | 0.1001 | 1 | K |
| 121.300 | 176.400 | 56.000 | 0.0 | 0.1001 | 0.1001 | 0.1001 | 0.1001 | 1 | R |
| 116.900 | 176.100 | 57.800 | 0.0 | 0.1001 | 0.1001 | 0.1001 | 0.1001 | 1 | S |
| 124.300 | 173.900 | 60.400 | 0.0 | 0.1001 | 0.1001 | 0.1001 | 0.1001 | 1 | V |
| 119.500 | 176.600 | 58.200 | 0.0 | 0.1001 | 0.1001 | 0.1001 | 0.1001 | 1 | S |
| 123.000 | 175.500 | 59.700 | 0.0 | 0.1001 | 0.1001 | 0.1001 | 0.1001 | 1 | E |
| 118.900 | 179.300 | 59.600 | 0.0 | 0.1001 | 0.1001 | 0.1001 | 0.1001 | 1 | K |
| 122.800 | 179.400 | 58.300 | 0.0 | 0.1001 | 0.1001 | 0.1001 | 0.1001 | 1 | L |
| 117.800 | 178.200 | 67.500 | 0.0 | 0.1001 | 0.1001 | 0.1001 | 0.1001 | 1 | T |
| 118.300 | 176.800 | 66.900 | 0.0 | 0.1001 | 0.1001 | 0.1001 | 0.1001 | 1 | T |
| 124.900 | 176.400 | 55.800 | 0.0 | 0.1001 | 0.1001 | 0.1001 | 0.1001 | 1 | A |
| 118.300 | 180.000 | 59.600 | 0.0 | 0.1001 | 0.1001 | 0.1001 | 0.1001 | 1 | M |
| 119.500 | 178.300 | 56.300 | 0.0 | 0.1001 | 0.1001 | 0.1001 | 0.1001 | 1 | N |
| 122.500 | 179.000 | 59.700 | 0.0 | 0.1001 | 0.1001 | 0.1001 | 0.1001 | 1 | R |
| 123.100 | 179.300 | 60.600 | 0.0 | 0.1001 | 0.1001 | 0.1001 | 0.1001 | 1 | F |
| 119.800 | 176.400 | 60.700 | 0.0 | 0.1001 | 0.1001 | 0.1001 | 0.1001 | 1 | K |
| 119.000 | 177.600 | 55.000 | 0.0 | 0.1001 | 0.1001 | 0.1001 | 0.1001 | 1 | A |
| 122.200 | 180.400 | 55.200 | 0.0 | 0.1001 | 0.1001 | 0.1001 | 0.1001 | 1 | A |
| 118.900 | 179.800 | 57.500 | 0.0 | 0.1001 | 0.1001 | 0.1001 | 0.1001 | 1 | L |
| 120.500 | 179.200 | 59.900 | 0.0 | 0.1001 | 0.1001 | 0.1001 | 0.1001 | 1 | E |
| 122.200 | 180.500 | 59.400 | 0.0 | 0.1001 | 0.1001 | 0.1001 | 0.1001 | 1 | E |
| 122.800 | 179.600 | 55.700 | 0.0 | 0.1001 | 0.1001 | 0.1001 | 0.1001 | 1 | A |
| 115.700 | 178.500 | 56.300 | 0.0 | 0.1001 | 0.1001 | 0.1001 | 0.1001 | 1 | N |
| 105.500 | 177.600 | 47.000 | 0.0 | 0.1001 | 0.1001 | 0.1001 | 0.1001 | 1 | G |
| 123.500 | 177.100 | 58.700 | 0.0 | 0.1001 | 0.1001 | 0.1001 | 0.1001 | 1 | E |
| 120.300 | 178.500 | 65.500 | 0.0 | 0.1001 | 0.1001 | 0.1001 | 0.1001 | 1 | I |
| 119.400 | 178.300 | 59.700 | 0.0 | 0.1001 | 0.1001 | 0.1001 | 0.1001 | 1 | E |
| 121.600 | 180.200 | 59.900 | 0.0 | 0.1001 | 0.1001 | 0.1001 | 0.1001 | 1 | K |
| 115.900 | 179.200 | 58.200 | 0.0 | 0.1001 | 0.1001 | 0.1001 | 0.1001 | 1 | F |
| 113.300 | 174.100 | 60.500 | 0.0 | 0.1001 | 0.1001 | 0.1001 | 0.1001 | 1 | S |
| 119.500 | 173.700 | 52.100 | 0.0 | 0.1001 | 0.1001 | 0.1001 | 0.1001 | 1 | N |
| 114.600 | 177.700 | 62.200 | 0.0 | 0.1001 | 0.1001 | 0.1001 | 0.1001 | 1 | S |
| 119.700 | 177.100 | 55.400 | 0.0 | 0.1001 | 0.1001 | 0.1001 | 0.1001 | 1 | N |
| 122.100 | 179.100 | 64.700 | 0.0 | 0.1001 | 0.1001 | 0.1001 | 0.1001 | 1 | I |
| 119.200 | 176.900 | 63.800 | 0.0 | 0.1001 | 0.1001 | 0.1001 | 0.1001 | 1 | C |
| 119.200 | 177.400 | 59.500 | 0.0 | 0.1001 | 0.1001 | 0.1001 | 0.1001 | 1 | R |
| 120.300 | 178.500 | 61.500 | 0.0 | 0.1001 | 0.1001 | 0.1001 | 0.1001 | 1 | F |
| 117.900 | 177.200 | 57.400 | 0.0 | 0.1001 | 0.1001 | 0.1001 | 0.1001 | 1 | L |
| 112.000 | 178.700 | 65.200 | 0.0 | 0.1001 | 0.1001 | 0.1001 | 0.1001 | 1 | T |
| 122.400 | 174.900 | 53.000 | 0.0 | 0.1001 | 0.1001 | 0.1001 | 0.1001 | 1 | A |
| 112.900 | 177.500 | 57.600 | 0.0 | 0.1001 | 0.1001 | 0.1001 | 0.1001 | 1 | S |
| 116.400 | 176.700 | 54.000 | 0.0 | 0.1001 | 0.1001 | 0.1001 | 0.1001 | 1 | D |
| 131.100 | 177.000 | 58.000 | 0.0 | 0.1001 | 0.1001 | 0.1001 | 0.1001 | 1 | L |
| 113.600 | 177.200 | 55.700 | 0.0 | 0.1001 | 0.1001 | 0.1001 | 0.1001 | 1 | F |
| 119.500 | 175.400 | 61.100 | 0.0 | 0.1001 | 0.1001 | 0.1001 | 0.1001 | 1 | K |
| 117.800 | 178.900 | 57.800 | 0.0 | 0.1001 | 0.1001 | 0.1001 | 0.1001 | 1 | D |
| 122.600 | 179.000 | 65.700 | 0.0 | 0.1001 | 0.1001 | 0.1001 | 0.1001 | 1 | V |
| 121.000 | 177.100 | 56.200 | 0.0 | 0.1001 | 0.1001 | 0.1001 | 0.1001 | 1 | N |
| 120.700 | 178.500 | 59.100 | 0.0 | 0.1001 | 0.1001 | 0.1001 | 0.1001 | 1 | R |
| 119.700 | 177.900 | 60.100 | 0.0 | 0.1001 | 0.1001 | 0.1001 | 0.1001 | 1 | K |
| 118.200 | 179.300 | 58.500 | 0.0 | 0.1001 | 0.1001 | 0.1001 | 0.1001 | 1 | L |

|         |         |        |     |        |        |        |        |   |   |
|---------|---------|--------|-----|--------|--------|--------|--------|---|---|
| 111.700 | 178.400 | 61.400 | 0.0 | 0.1001 | 0.1001 | 0.1001 | 0.1001 | 1 | S |
| 122.000 | 177.500 | 57.900 | 0.0 | 0.1001 | 0.1001 | 0.1001 | 0.1001 | 1 | D |
| 119.200 | 179.700 | 65.600 | 0.0 | 0.1001 | 0.1001 | 0.1001 | 0.1001 | 1 | V |
| 121.900 | 178.400 | 60.100 | 0.0 | 0.1001 | 0.1001 | 0.1001 | 0.1001 | 1 | W |
| 119.500 | 178.000 | 60.500 | 0.0 | 0.1001 | 0.1001 | 0.1001 | 0.1001 | 1 | K |
| 116.700 | 178.000 | 58.800 | 0.0 | 0.1001 | 0.1001 | 0.1001 | 0.1001 | 1 | E |
| 119.000 | 178.400 | 57.800 | 0.0 | 0.1001 | 0.1001 | 0.1001 | 0.1001 | 1 | L |
| 113.100 | 177.600 | 61.600 | 0.0 | 0.1001 | 0.1001 | 0.1001 | 0.1001 | 1 | S |
| 121.500 | 176.300 | 58.000 | 0.0 | 0.1001 | 0.1001 | 0.1001 | 0.1001 | 1 | L |
| 118.200 | 179.100 | 57.700 | 0.0 | 0.1001 | 0.1001 | 0.1001 | 0.1001 | 1 | L |
| 118.700 | 179.600 | 57.600 | 0.0 | 0.1001 | 0.1001 | 0.1001 | 0.1001 | 1 | L |
| 119.500 | 179.300 | 58.800 | 0.0 | 0.1001 | 0.1001 | 0.1001 | 0.1001 | 1 | Q |
| 117.600 | 178.200 | 65.400 | 0.0 | 0.1001 | 0.1001 | 0.1001 | 0.1001 | 1 | V |
| 116.900 | 177.900 | 58.400 | 0.0 | 0.1001 | 0.1001 | 0.1001 | 0.1001 | 1 | E |
| 113.300 | 177.700 | 54.500 | 0.0 | 0.1001 | 0.1001 | 0.1001 | 0.1001 | 1 | Q |
| 114.800 | 174.700 | 56.600 | 0.0 | 0.1001 | 0.1001 | 0.1001 | 0.1001 | 1 | R |
| 120.300 | 175.600 | 53.700 | 0.0 | 0.1001 | 0.1001 | 0.1001 | 0.1001 | 1 | M |
| 120.000 | 176.300 | 61.700 | 0.0 | 0.1001 | 0.1001 | 0.1001 | 0.1001 | 1 | V |
| 121.200 | 175.800 | 56.200 | 0.0 | 0.1001 | 0.1001 | 0.1001 | 0.1001 | 1 | S |
| 119.900 | 177.100 | 61.300 | 0.0 | 0.1001 | 0.1001 | 0.1001 | 0.1001 | 1 | I |
| 119.000 | 176.300 | 58.300 | 0.0 | 0.1001 | 0.1001 | 0.1001 | 0.1001 | 1 | S |
| 122.600 | 174.600 | 56.300 | 0.0 | 0.1001 | 0.1001 | 0.1001 | 0.1001 | 1 | Q |
| 109.200 | 176.200 | 45.200 | 0.0 | 0.1001 | 0.1001 | 0.1001 | 0.1001 | 1 | G |
| 124.700 | 175.100 | 53.800 | 0.0 | 0.1001 | 0.1001 | 0.1001 | 0.1001 | 1 | A |
| 113.200 | 178.700 | 58.500 | 0.0 | 0.1001 | 0.1001 | 0.1001 | 0.1001 | 1 | S |
| 122.800 | 175.700 | 58.900 | 0.0 | 0.1001 | 0.1001 | 0.1001 | 0.1001 | 1 | W |
| 120.600 | 178.200 | 55.700 | 0.0 | 0.1001 | 0.1001 | 0.1001 | 0.1001 | 1 | A |
| 118.900 | 180.700 | 59.000 | 0.0 | 0.1001 | 0.1001 | 0.1001 | 0.1001 | 1 | Q |
| 120.900 | 179.200 | 59.000 | 0.0 | 0.1001 | 0.1001 | 0.1001 | 0.1001 | 1 | E |
| 118.200 | 177.800 | 57.200 | 0.0 | 0.1001 | 0.1001 | 0.1001 | 0.1001 | 1 | D |
| 116.900 | 178.100 | 58.900 | 0.0 | 0.1001 | 0.1001 | 0.1001 | 0.1001 | 1 | Q |
| 119.500 | 178.400 | 58.900 | 0.0 | 0.1001 | 0.1001 | 0.1001 | 0.1001 | 1 | Q |
| 121.700 | 178.900 | 57.300 | 0.0 | 0.1001 | 0.1001 | 0.1001 | 0.1001 | 1 | D |
| 121.000 | 177.700 | 55.400 | 0.0 | 0.1001 | 0.1001 | 0.1001 | 0.1001 | 1 | A |
| 119.100 | 180.800 | 57.600 | 0.0 | 0.1001 | 0.1001 | 0.1001 | 0.1001 | 1 | D |
| 119.500 | 178.600 | 59.700 | 0.0 | 0.1001 | 0.1001 | 0.1001 | 0.1001 | 1 | E |
| 121.000 | 180.100 | 57.500 | 0.0 | 0.1001 | 0.1001 | 0.1001 | 0.1001 | 1 | D |
| 121.400 | 179.500 | 59.500 | 0.0 | 0.1001 | 0.1001 | 0.1001 | 0.1001 | 1 | R |
| 119.400 | 178.700 | 59.400 | 0.0 | 0.1001 | 0.1001 | 0.1001 | 0.1001 | 1 | R |
| 120.300 | 178.400 | 54.100 | 0.0 | 0.1001 | 0.1001 | 0.1001 | 0.1001 | 1 | A |
| 119.900 | 179.500 | 60.500 | 0.0 | 0.1001 | 0.1001 | 0.1001 | 0.1001 | 1 | F |
| 118.500 | 176.900 | 56.900 | 0.0 | 0.1001 | 0.1001 | 0.1001 | 0.1001 | 1 | Q |
| 118.000 | 176.400 | 56.000 | 0.0 | 0.1001 | 0.1001 | 0.1001 | 0.1001 | 1 | M |
| 121.200 | 176.300 | 55.400 | 0.0 | 0.1001 | 0.1001 | 0.1001 | 0.1001 | 1 | L |
| 121.800 | 177.100 | 56.200 | 0.0 | 0.1001 | 0.1001 | 0.1001 | 0.1001 | 1 | R |
| 123.100 | 176.000 | 56.000 | 0.0 | 0.1001 | 0.1001 | 0.1001 | 0.1001 | 1 | R |
| 126.900 | 174.900 | 55.800 | 0.0 | 0.1001 | 0.1001 | 0.1001 | 0.1001 | 1 | D |

Supporting Table S10: CANCA signal table for SrtC, with 0.1001 ppm chemical shift uncertainties and unambiguous residue-type assignments.

| N(i)    | CA(i)  | CA(i-1) |     | dN     | dCA    | dCA    |        | restype |
|---------|--------|---------|-----|--------|--------|--------|--------|---------|
| 120.000 | 59.400 | 57.900  | 0.0 | 0.1001 | 0.1001 | 0.1001 | 0.1001 | 1 E     |
| 117.300 | 55.800 | 59.400  | 0.0 | 0.1001 | 0.1001 | 0.1001 | 0.1001 | 1 N     |
| 119.700 | 58.400 | 55.800  | 0.0 | 0.1001 | 0.1001 | 0.1001 | 0.1001 | 1 L     |
| 118.200 | 60.000 | 58.400  | 0.0 | 0.1001 | 0.1001 | 0.1001 | 0.1001 | 1 K     |
| 118.400 | 59.100 | 60.000  | 0.0 | 0.1001 | 0.1001 | 0.1001 | 0.1001 | 1 H     |
| 120.300 | 66.000 | 59.100  | 0.0 | 0.1001 | 0.1001 | 0.1001 | 0.1001 | 1 I     |
| 120.200 | 65.800 | 66.000  | 0.0 | 0.1001 | 0.1001 | 0.1001 | 0.1001 | 1 I     |
| 115.400 | 66.900 | 65.800  | 0.0 | 0.1001 | 0.1001 | 0.1001 | 0.1001 | 1 T     |
| 122.100 | 57.900 | 66.900  | 0.0 | 0.1001 | 0.1001 | 0.1001 | 0.1001 | 1 L     |
| 105.800 | 47.500 | 57.900  | 0.0 | 0.1001 | 0.1001 | 0.1001 | 0.1001 | 1 G     |
| 119.600 | 59.300 | 47.500  | 0.0 | 0.1001 | 0.1001 | 0.1001 | 0.1001 | 1 Q     |
| 122.600 | 66.700 | 59.300  | 0.0 | 0.1001 | 0.1001 | 0.1001 | 0.1001 | 1 V     |
| 121.000 | 65.800 | 66.700  | 0.0 | 0.1001 | 0.1001 | 0.1001 | 0.1001 | 1 I     |
| 118.900 | 61.300 | 65.800  | 0.0 | 0.1001 | 0.1001 | 0.1001 | 0.1001 | 1 H     |
| 118.500 | 59.500 | 61.300  | 0.0 | 0.1001 | 0.1001 | 0.1001 | 0.1001 | 1 K     |
| 117.600 | 59.200 | 59.500  | 0.0 | 0.1001 | 0.1001 | 0.1001 | 0.1001 | 1 R     |
| 118.100 | 65.900 | 59.200  | 0.0 | 0.1001 | 0.1001 | 0.1001 | 0.1001 | 1 C     |
| 117.900 | 58.300 | 65.900  | 0.0 | 0.1001 | 0.1001 | 0.1001 | 0.1001 | 1 E     |
| 115.400 | 55.900 | 58.300  | 0.0 | 0.1001 | 0.1001 | 0.1001 | 0.1001 | 1 E     |
| 120.500 | 56.400 | 55.900  | 0.0 | 0.1001 | 0.1001 | 0.1001 | 0.1001 | 1 M     |
| 120.500 | 57.000 | 56.400  | 0.0 | 0.1001 | 0.1001 | 0.1001 | 0.1001 | 1 K     |
| 115.500 | 55.000 | 57.000  | 0.0 | 0.1001 | 0.1001 | 0.1001 | 0.1001 | 1 Y     |
| 113.600 | 60.400 | 55.000  | 0.0 | 0.1001 | 0.1001 | 0.1001 | 0.1001 | 1 C     |
| 115.800 | 60.700 | 60.400  | 0.0 | 0.1001 | 0.1001 | 0.1001 | 0.1001 | 1 K     |
| 121.000 | 59.000 | 60.700  | 0.0 | 0.1001 | 0.1001 | 0.1001 | 0.1001 | 1 K     |
| 120.500 | 59.300 | 59.000  | 0.0 | 0.1001 | 0.1001 | 0.1001 | 0.1001 | 1 Q     |
| 118.800 | 64.300 | 59.300  | 0.0 | 0.1001 | 0.1001 | 0.1001 | 0.1001 | 1 C     |
| 119.300 | 59.300 | 64.300  | 0.0 | 0.1001 | 0.1001 | 0.1001 | 0.1001 | 1 R     |
| 119.700 | 58.200 | 59.300  | 0.0 | 0.1001 | 0.1001 | 0.1001 | 0.1001 | 1 R     |
| 120.600 | 58.300 | 58.200  | 0.0 | 0.1001 | 0.1001 | 0.1001 | 0.1001 | 1 L     |
| 105.200 | 48.400 | 58.300  | 0.0 | 0.1001 | 0.1001 | 0.1001 | 0.1001 | 1 G     |
| 120.500 | 59.600 | 48.400  | 0.0 | 0.1001 | 0.1001 | 0.1001 | 0.1001 | 1 H     |
| 121.900 | 59.500 | 59.600  | 0.0 | 0.1001 | 0.1001 | 0.1001 | 0.1001 | 1 R     |
| 118.500 | 67.800 | 59.500  | 0.0 | 0.1001 | 0.1001 | 0.1001 | 0.1001 | 1 V     |
| 118.300 | 58.000 | 67.800  | 0.0 | 0.1001 | 0.1001 | 0.1001 | 0.1001 | 1 L     |
| 104.900 | 46.700 | 58.000  | 0.0 | 0.1001 | 0.1001 | 0.1001 | 0.1001 | 1 G     |
| 120.500 | 56.500 | 46.700  | 0.0 | 0.1001 | 0.1001 | 0.1001 | 0.1001 | 1 L     |
| 108.700 | 62.700 | 56.500  | 0.0 | 0.1001 | 0.1001 | 0.1001 | 0.1001 | 1 I     |
| 122.800 | 60.700 | 62.700  | 0.0 | 0.1001 | 0.1001 | 0.1001 | 0.1001 | 1 K     |
| 114.400 | 57.100 | 65.500  | 0.0 | 0.1001 | 0.1001 | 0.1001 | 0.1001 | 1 L     |
| 119.200 | 59.500 | 57.100  | 0.0 | 0.1001 | 0.1001 | 0.1001 | 0.1001 | 1 E     |
| 116.500 | 57.600 | 59.500  | 0.0 | 0.1001 | 0.1001 | 0.1001 | 0.1001 | 1 M     |
| 119.900 | 56.600 | 57.600  | 0.0 | 0.1001 | 0.1001 | 0.1001 | 0.1001 | 1 L     |
| 118.300 | 57.700 | 56.600  | 0.0 | 0.1001 | 0.1001 | 0.1001 | 0.1001 | 1 Q     |
| 119.000 | 55.300 | 57.700  | 0.0 | 0.1001 | 0.1001 | 0.1001 | 0.1001 | 1 D     |
| 119.500 | 56.700 | 55.300  | 0.0 | 0.1001 | 0.1001 | 0.1001 | 0.1001 | 1 Q     |
| 108.100 | 46.000 | 56.700  | 0.0 | 0.1001 | 0.1001 | 0.1001 | 0.1001 | 1 G     |

|         |        |        |     |        |        |        |        |   |   |
|---------|--------|--------|-----|--------|--------|--------|--------|---|---|
| 120.200 | 56.500 | 46.000 | 0.0 | 0.1001 | 0.1001 | 0.1001 | 0.1001 | 1 | K |
| 121.300 | 56.000 | 56.500 | 0.0 | 0.1001 | 0.1001 | 0.1001 | 0.1001 | 1 | R |
| 116.900 | 57.800 | 56.000 | 0.0 | 0.1001 | 0.1001 | 0.1001 | 0.1001 | 1 | S |
| 124.300 | 60.400 | 57.800 | 0.0 | 0.1001 | 0.1001 | 0.1001 | 0.1001 | 1 | V |
| 119.500 | 58.200 | 62.500 | 0.0 | 0.1001 | 0.1001 | 0.1001 | 0.1001 | 1 | S |
| 123.000 | 59.700 | 58.200 | 0.0 | 0.1001 | 0.1001 | 0.1001 | 0.1001 | 1 | E |
| 118.900 | 59.600 | 59.700 | 0.0 | 0.1001 | 0.1001 | 0.1001 | 0.1001 | 1 | K |
| 122.800 | 58.300 | 59.600 | 0.0 | 0.1001 | 0.1001 | 0.1001 | 0.1001 | 1 | L |
| 117.800 | 67.500 | 58.300 | 0.0 | 0.1001 | 0.1001 | 0.1001 | 0.1001 | 1 | T |
| 118.300 | 66.900 | 67.500 | 0.0 | 0.1001 | 0.1001 | 0.1001 | 0.1001 | 1 | T |
| 124.900 | 55.800 | 66.900 | 0.0 | 0.1001 | 0.1001 | 0.1001 | 0.1001 | 1 | A |
| 118.300 | 59.600 | 55.800 | 0.0 | 0.1001 | 0.1001 | 0.1001 | 0.1001 | 1 | M |
| 119.500 | 56.300 | 59.600 | 0.0 | 0.1001 | 0.1001 | 0.1001 | 0.1001 | 1 | N |
| 122.500 | 59.700 | 56.300 | 0.0 | 0.1001 | 0.1001 | 0.1001 | 0.1001 | 1 | R |
| 123.100 | 60.600 | 59.700 | 0.0 | 0.1001 | 0.1001 | 0.1001 | 0.1001 | 1 | F |
| 119.800 | 60.700 | 60.600 | 0.0 | 0.1001 | 0.1001 | 0.1001 | 0.1001 | 1 | K |
| 119.000 | 55.000 | 60.700 | 0.0 | 0.1001 | 0.1001 | 0.1001 | 0.1001 | 1 | A |
| 122.200 | 55.200 | 55.000 | 0.0 | 0.1001 | 0.1001 | 0.1001 | 0.1001 | 1 | A |
| 118.900 | 57.500 | 55.200 | 0.0 | 0.1001 | 0.1001 | 0.1001 | 0.1001 | 1 | L |
| 120.500 | 59.900 | 57.500 | 0.0 | 0.1001 | 0.1001 | 0.1001 | 0.1001 | 1 | E |
| 122.200 | 59.400 | 59.900 | 0.0 | 0.1001 | 0.1001 | 0.1001 | 0.1001 | 1 | E |
| 122.800 | 55.700 | 59.400 | 0.0 | 0.1001 | 0.1001 | 0.1001 | 0.1001 | 1 | A |
| 115.700 | 56.300 | 55.700 | 0.0 | 0.1001 | 0.1001 | 0.1001 | 0.1001 | 1 | N |
| 105.500 | 47.000 | 56.300 | 0.0 | 0.1001 | 0.1001 | 0.1001 | 0.1001 | 1 | G |
| 123.500 | 58.700 | 47.000 | 0.0 | 0.1001 | 0.1001 | 0.1001 | 0.1001 | 1 | E |
| 120.300 | 65.500 | 58.700 | 0.0 | 0.1001 | 0.1001 | 0.1001 | 0.1001 | 1 | I |
| 119.400 | 59.700 | 65.500 | 0.0 | 0.1001 | 0.1001 | 0.1001 | 0.1001 | 1 | E |
| 121.600 | 59.900 | 59.700 | 0.0 | 0.1001 | 0.1001 | 0.1001 | 0.1001 | 1 | K |
| 115.900 | 58.200 | 59.900 | 0.0 | 0.1001 | 0.1001 | 0.1001 | 0.1001 | 1 | F |
| 113.300 | 60.500 | 58.200 | 0.0 | 0.1001 | 0.1001 | 0.1001 | 0.1001 | 1 | S |
| 119.500 | 52.100 | 60.500 | 0.0 | 0.1001 | 0.1001 | 0.1001 | 0.1001 | 1 | N |
| 127.400 | 59.800 | 52.100 | 0.0 | 0.1001 | 0.1001 | 0.1001 | 0.1001 | 1 | R |
| 114.600 | 62.200 | 59.800 | 0.0 | 0.1001 | 0.1001 | 0.1001 | 0.1001 | 1 | S |
| 119.700 | 55.400 | 62.200 | 0.0 | 0.1001 | 0.1001 | 0.1001 | 0.1001 | 1 | N |
| 122.100 | 64.700 | 55.400 | 0.0 | 0.1001 | 0.1001 | 0.1001 | 0.1001 | 1 | I |
| 119.200 | 63.800 | 64.700 | 0.0 | 0.1001 | 0.1001 | 0.1001 | 0.1001 | 1 | C |
| 119.200 | 59.500 | 63.800 | 0.0 | 0.1001 | 0.1001 | 0.1001 | 0.1001 | 1 | R |
| 120.300 | 61.500 | 59.500 | 0.0 | 0.1001 | 0.1001 | 0.1001 | 0.1001 | 1 | F |
| 117.900 | 57.400 | 61.500 | 0.0 | 0.1001 | 0.1001 | 0.1001 | 0.1001 | 1 | L |
| 112.000 | 65.200 | 57.400 | 0.0 | 0.1001 | 0.1001 | 0.1001 | 0.1001 | 1 | T |
| 122.400 | 53.000 | 65.200 | 0.0 | 0.1001 | 0.1001 | 0.1001 | 0.1001 | 1 | A |
| 112.900 | 57.600 | 53.000 | 0.0 | 0.1001 | 0.1001 | 0.1001 | 0.1001 | 1 | S |
| 125.700 | 57.700 | 57.600 | 0.0 | 0.1001 | 0.1001 | 0.1001 | 0.1001 | 1 | Q |
| 116.400 | 54.000 | 57.700 | 0.0 | 0.1001 | 0.1001 | 0.1001 | 0.1001 | 1 | D |
| 131.100 | 58.000 | 60.800 | 0.0 | 0.1001 | 0.1001 | 0.1001 | 0.1001 | 1 | L |
| 113.600 | 55.700 | 58.000 | 0.0 | 0.1001 | 0.1001 | 0.1001 | 0.1001 | 1 | F |
| 119.500 | 61.100 | 55.700 | 0.0 | 0.1001 | 0.1001 | 0.1001 | 0.1001 | 1 | K |
| 117.800 | 57.800 | 61.100 | 0.0 | 0.1001 | 0.1001 | 0.1001 | 0.1001 | 1 | D |
| 122.600 | 65.700 | 57.800 | 0.0 | 0.1001 | 0.1001 | 0.1001 | 0.1001 | 1 | V |
| 121.000 | 56.200 | 65.700 | 0.0 | 0.1001 | 0.1001 | 0.1001 | 0.1001 | 1 | N |
| 120.700 | 59.100 | 56.200 | 0.0 | 0.1001 | 0.1001 | 0.1001 | 0.1001 | 1 | R |

|         |        |        |     |        |        |        |        |   |   |
|---------|--------|--------|-----|--------|--------|--------|--------|---|---|
| 119.700 | 60.100 | 59.100 | 0.0 | 0.1001 | 0.1001 | 0.1001 | 0.1001 | 1 | K |
| 118.200 | 58.500 | 60.100 | 0.0 | 0.1001 | 0.1001 | 0.1001 | 0.1001 | 1 | L |
| 111.700 | 61.400 | 58.500 | 0.0 | 0.1001 | 0.1001 | 0.1001 | 0.1001 | 1 | S |
| 122.000 | 57.900 | 61.400 | 0.0 | 0.1001 | 0.1001 | 0.1001 | 0.1001 | 1 | D |
| 119.200 | 65.600 | 57.900 | 0.0 | 0.1001 | 0.1001 | 0.1001 | 0.1001 | 1 | V |
| 121.900 | 60.100 | 65.600 | 0.0 | 0.1001 | 0.1001 | 0.1001 | 0.1001 | 1 | W |
| 119.500 | 60.500 | 60.100 | 0.0 | 0.1001 | 0.1001 | 0.1001 | 0.1001 | 1 | K |
| 116.700 | 58.800 | 60.500 | 0.0 | 0.1001 | 0.1001 | 0.1001 | 0.1001 | 1 | E |
| 119.000 | 57.800 | 58.800 | 0.0 | 0.1001 | 0.1001 | 0.1001 | 0.1001 | 1 | L |
| 113.100 | 61.600 | 57.800 | 0.0 | 0.1001 | 0.1001 | 0.1001 | 0.1001 | 1 | S |
| 121.500 | 58.000 | 61.600 | 0.0 | 0.1001 | 0.1001 | 0.1001 | 0.1001 | 1 | L |
| 118.200 | 57.700 | 58.000 | 0.0 | 0.1001 | 0.1001 | 0.1001 | 0.1001 | 1 | L |
| 118.700 | 57.600 | 57.700 | 0.0 | 0.1001 | 0.1001 | 0.1001 | 0.1001 | 1 | L |
| 119.500 | 58.800 | 57.600 | 0.0 | 0.1001 | 0.1001 | 0.1001 | 0.1001 | 1 | Q |
| 117.600 | 65.400 | 58.800 | 0.0 | 0.1001 | 0.1001 | 0.1001 | 0.1001 | 1 | V |
| 116.900 | 58.400 | 65.400 | 0.0 | 0.1001 | 0.1001 | 0.1001 | 0.1001 | 1 | E |
| 113.300 | 54.500 | 58.400 | 0.0 | 0.1001 | 0.1001 | 0.1001 | 0.1001 | 1 | Q |
| 114.800 | 56.600 | 54.500 | 0.0 | 0.1001 | 0.1001 | 0.1001 | 0.1001 | 1 | R |
| 120.300 | 53.700 | 56.600 | 0.0 | 0.1001 | 0.1001 | 0.1001 | 0.1001 | 1 | M |
| 120.000 | 61.700 | 62.800 | 0.0 | 0.1001 | 0.1001 | 0.1001 | 0.1001 | 1 | V |
| 121.200 | 56.200 | 61.700 | 0.0 | 0.1001 | 0.1001 | 0.1001 | 0.1001 | 1 | S |
| 119.900 | 61.300 | 63.400 | 0.0 | 0.1001 | 0.1001 | 0.1001 | 0.1001 | 1 | I |
| 119.000 | 58.300 | 61.300 | 0.0 | 0.1001 | 0.1001 | 0.1001 | 0.1001 | 1 | S |
| 122.600 | 56.300 | 58.300 | 0.0 | 0.1001 | 0.1001 | 0.1001 | 0.1001 | 1 | Q |
| 109.200 | 45.200 | 56.300 | 0.0 | 0.1001 | 0.1001 | 0.1001 | 0.1001 | 1 | G |
| 124.700 | 53.800 | 45.200 | 0.0 | 0.1001 | 0.1001 | 0.1001 | 0.1001 | 1 | A |
| 113.200 | 58.500 | 53.800 | 0.0 | 0.1001 | 0.1001 | 0.1001 | 0.1001 | 1 | S |
| 122.800 | 58.900 | 58.500 | 0.0 | 0.1001 | 0.1001 | 0.1001 | 0.1001 | 1 | W |
| 120.600 | 55.700 | 58.900 | 0.0 | 0.1001 | 0.1001 | 0.1001 | 0.1001 | 1 | A |
| 118.900 | 59.000 | 55.700 | 0.0 | 0.1001 | 0.1001 | 0.1001 | 0.1001 | 1 | Q |
| 120.900 | 59.000 | 59.000 | 0.0 | 0.1001 | 0.1001 | 0.1001 | 0.1001 | 1 | E |
| 118.200 | 57.200 | 59.000 | 0.0 | 0.1001 | 0.1001 | 0.1001 | 0.1001 | 1 | D |
| 116.900 | 58.900 | 57.200 | 0.0 | 0.1001 | 0.1001 | 0.1001 | 0.1001 | 1 | Q |
| 119.500 | 58.900 | 58.900 | 0.0 | 0.1001 | 0.1001 | 0.1001 | 0.1001 | 1 | Q |
| 121.700 | 57.300 | 58.900 | 0.0 | 0.1001 | 0.1001 | 0.1001 | 0.1001 | 1 | D |
| 121.000 | 55.400 | 57.300 | 0.0 | 0.1001 | 0.1001 | 0.1001 | 0.1001 | 1 | A |
| 119.100 | 57.600 | 55.400 | 0.0 | 0.1001 | 0.1001 | 0.1001 | 0.1001 | 1 | D |
| 119.500 | 59.700 | 57.600 | 0.0 | 0.1001 | 0.1001 | 0.1001 | 0.1001 | 1 | E |
| 121.000 | 57.500 | 59.700 | 0.0 | 0.1001 | 0.1001 | 0.1001 | 0.1001 | 1 | D |
| 121.400 | 59.500 | 57.500 | 0.0 | 0.1001 | 0.1001 | 0.1001 | 0.1001 | 1 | R |
| 119.400 | 59.400 | 59.500 | 0.0 | 0.1001 | 0.1001 | 0.1001 | 0.1001 | 1 | R |
| 120.300 | 54.100 | 59.400 | 0.0 | 0.1001 | 0.1001 | 0.1001 | 0.1001 | 1 | A |
| 119.900 | 60.500 | 54.100 | 0.0 | 0.1001 | 0.1001 | 0.1001 | 0.1001 | 1 | F |
| 118.500 | 56.900 | 60.500 | 0.0 | 0.1001 | 0.1001 | 0.1001 | 0.1001 | 1 | Q |
| 118.000 | 56.000 | 56.900 | 0.0 | 0.1001 | 0.1001 | 0.1001 | 0.1001 | 1 | M |
| 121.200 | 55.400 | 56.000 | 0.0 | 0.1001 | 0.1001 | 0.1001 | 0.1001 | 1 | L |
| 121.800 | 56.200 | 55.400 | 0.0 | 0.1001 | 0.1001 | 0.1001 | 0.1001 | 1 | R |
| 123.100 | 56.000 | 56.200 | 0.0 | 0.1001 | 0.1001 | 0.1001 | 0.1001 | 1 | R |
| 126.900 | 55.800 | 56.000 | 0.0 | 0.1001 | 0.1001 | 0.1001 | 0.1001 | 1 | D |
